1 **The hippocampus as a sorter and reverberatory integrator of sensory inputs**

2  
3 Masanori Nomoto<sup>1,2,3</sup>, Emi Murayama<sup>1,2,3</sup>, Shuntaro Ohno<sup>1,2,3</sup>, Reiko Okubo-Suzuki<sup>1,2,3</sup>,  
4 Shin-ichi Muramatsu<sup>4,5</sup>, Kaoru Inokuchi<sup>1,2,3</sup>†

5 <sup>1</sup>Research Centre for Idling Brain Science, University of Toyama, Toyama 930-0194,  
6 Japan.

7 <sup>2</sup>Department of Biochemistry, Graduate School of Medicine and Pharmaceutical  
8 Sciences, University of Toyama, Toyama 930-0194, Japan.

9 <sup>3</sup>CREST, JST, University of Toyama, Toyama 930-0194, Japan.

10 <sup>4</sup>Division of Neurology, Department of Medicine, Jichi Medical University, Tochigi  
11 329-0498, Japan.

12 <sup>5</sup>Center for Gene and Cell Therapy, The Institute of Medical Science, The University of  
13 Tokyo, Tokyo 108-8639, Japan.

14  
15 † Correspondence should be addressed to K.I.: [inokuchi@med.u-toyama.ac.jp](mailto:inokuchi@med.u-toyama.ac.jp)

18 **In entorhinal-hippocampal networks, the trisynaptic pathway, including the CA3**  
19 **recurrent circuit, processes episodes of context and space<sup>1-3</sup>. Recurrent**  
20 **connectivity can generate reverberatory activity<sup>4-6</sup>, an intrinsic activity pattern of**  
21 **neurons that occurs after sensory inputs have ceased. However, the role of**  
22 **reverberatory activity in memory encoding remains incompletely understood.**  
23 **Here we demonstrate that in mice, synchrony between conditioned stimulus (CS)**  
24 **and unconditioned stimulus (US)-responsible cells occurs during the reverberatory**  
25 **phase, lasting for approximately 15 s, but not during CS and US inputs, in the CA1**  
26 **and the reverberation is crucial for the linking of CS and US in the encoding of**  
27 **delay-type cued-fear memory. Retrieval-responsive cells developed primarily**  
28 **during the reverberatory phase. Mutant mice lacking N-methyl-D-aspartate**  
29 **receptors (NRs) in CA3 showed a cued-fear memory impairment and a decrease in**  
30 **synchronized reverberatory activities between CS- and US-responsive CA1 cells.**  
31 **Optogenetic CA3 silencing at the reverberatory phase during learning impaired**  
32 **cued-fear memory. Our findings suggest that reverberation recruits future**  
33 **retrieval-responsive cells via synchrony between CS- and US-responsive cells. The**  
34 **hippocampus uses reverberatory activity to link CS and US inputs, and avoid**  
35 **crosstalk during sensory inputs.**

36

37 The hippocampus, a centre of multimodal convergence, is crucial for learning and  
38 memory of associative episodes<sup>7</sup>. The hippocampus is primarily comprised of four  
39 subfields: the dentate gyrus (DG), CA3, CA2, and CA1. There are two parallel  
40 pathways, the trisynaptic pathway and the monosynaptic pathway. In the trisynaptic  
41 pathway, which is important for one-trial contextual learning, information flows from  
42 the entorhinal cortex (EC) to the DG, to CA3, to CA1, and finally to the EC<sup>1-3</sup>. In the  
43 monosynaptic pathway, which is important for temporal association, information flows  
44 from the EC to CA1 to the EC<sup>8</sup>. Among these pathways, the CA3 has a unique system, a  
45 recurrent circuit forming extensive interconnections within CA3 cells<sup>9</sup>. The CA3  
46 recurrent circuit is crucial for pattern completion<sup>10</sup>, an ability of recall from partial cue.  
47 In addition, theoretical models have suggested that the CA3 recurrent circuit  
48 implemented with NR function has a potential to generate reverberatory neuronal  
49 activities without input from external stimuli, and acts as an associator of temporally  
50 separated episodes by filling a temporal gap between discontinuous events<sup>11-15</sup>.  
51 However, experimental studies have indicated that the CA3 recurrent circuit of the  
52 trisynaptic pathway is not required for trace-type associative memory formation, which  
53 requires the ability to form temporal association between events<sup>8,16,17</sup>. Therefore, the  
54 roles in memory association of potential reverberatory activities in the hippocampus  
55 remain to be elucidated. The entorhinal-hippocampal network contains a microcircuit  
56 that restricts incorporation of US input as a part of CS representation during sensory  
57 inputs<sup>18</sup>. We hypothesized that the hippocampal network is programmed to process  
58 sensory information after termination of sensory inputs and reverberatory activities,  
59 which could represent the CS and the US, serve as an integrator to link neutral and  
60 aversive stimuli. We sought to determine whether and how reverberatory activities  
61 contribute to the CS-US association.

62 We subjected mutant mice that specifically lack NRs in CA3 (CA3-NR1 KO  
63 mice), and thus are deficient in NR current and synaptic plasticity at the recurrent CA3  
64 synapses<sup>10</sup>, to a delayed-type light-cued-fear conditioning (LFC) task<sup>19</sup> (Fig. 1a, b).  
65 CA3-NR1 KO mice and littermate controls were both subjected to pre-contextual  
66 habituation followed by training sessions to form an association between a light-cue CS  
67 and a footshock US with ten pairings. In the following test, CA3-NR1 KO mice  
68 exhibited impairment in long-term, but not short-term, cued-fear memory recall relative

69 to littermate controls (Fig. 1c, d). By contrast, CA3-NR1 KO mice did not exhibit  
70 impairments in long-term contextual fear memory in the LFC task (Fig. 1e) or in an  
71 alternative contextual fear memory task, which consisted of context pre-exposure and  
72 immediate footshock sessions<sup>20,21</sup> (Extended Data Fig. 1a, b). Our results testing  
73 contextual fear memories in CA3-NR1 KO mice confirmed previous findings, which  
74 suggested that CA3 NRs are important for novel contextual representation but not  
75 familiarised context representation<sup>1-3</sup>. Furthermore, long-term memory recall of an  
76 auditory-cued-fear conditioning (AFC) task was impaired in CA3-NR1 KO mice  
77 relative to controls (Fig. 1f, g), indicating that CA3 NRs are important for long-term  
78 cued-fear memory.

79 Lentivirus (LV) encoding calcium/calmodulin-dependent protein kinase II  
80 (CaMKII)-FLEX-eArch3.0-EYFP was bilaterally injected into the hippocampal CA3 of  
81 KA1::Cre heterozygous transgenic mice to specifically label and silence CA3 excitatory  
82 cells (Fig. 1h, i). One day after the training session, mice were subjected to test sessions  
83 during which a continuous laser (589 nm) was bilaterally delivered to the CA3, starting  
84 at the onset of the first CS in the LFC or AFC tasks (Fig. 1j). Mice with precise optical  
85 CA3 silencing exhibited impaired long-term cued-fear memory recall in both LFC and  
86 AFC tasks relative to the control (laser-OFF) group (Fig. 1k, l). These results indicated  
87 that NRs and neuronal activities in the CA3 are important for cued-fear memory, which  
88 is consistent with previous reports<sup>22-24</sup> indicating involvement of the hippocampus in  
89 cued-fear memory.

90 To investigate how the hippocampus processes CS and US information, and  
91 whether reverberatory activity emerges after termination of sensory stimuli in the cued-  
92 fear conditioning task, we monitored *in vivo* transient calcium ( $\text{Ca}^{2+}$ ) dynamics in  
93 hippocampal cells. CA3-NR1 KO mice and littermate controls were injected with an  
94 Adeno-Associated Virus (AAV) encoding CaMKII-G-CaMP7 and implanted with a  
95 micro-gradient index (GRIN) lens targeting the right CA1 (Fig. 2a). The same CA1  
96 cells were tracked across LFC task sessions, including a 30 min rest session after the  
97 training, using an automated sorting system to extract the  $\text{Ca}^{2+}$  activity of each neuron,  
98 which was then normalized using z-scores (Extended Data Fig. 2).

99 By calculating and comparing mean z-scores as indicators of the responsiveness  
100 for each session (please refer to Methods), we sorted training CS (CS)-, training US

101 (US)-, and long-term memory-test CS (Test-CS)-responsive subpopulations of cells that  
102 exhibited 2-fold higher responses to stimuli than in the baseline session on the training  
103 day before the corresponding CS or US (Fig 2b, c, f, i). We did not detect structural  
104 differences of these CA1 subpopulations between CA3-NR1 KO mice and littermate  
105 controls (Extended Data Fig. 3a-c). About half of the Test-CS-responsive cells had  
106 newly emerged and were not CS-responsive cells, indicating that this cell subpopulation  
107 that responded to the CS changed from the training session to the test session (Extended  
108 Data Fig. 3e). Notably, US input immediately and completely shut down the activity of  
109 CS-responsive and Test-CS-responsive cells (Fig 2b-e, i-k). The  $\text{Ca}^{2+}$  activities of the  
110 Test-CS-responsive cells, but not the CS-responsive or US-responsive cells, during CS  
111 presentation in the test session were higher than those in the corresponding acclimation  
112 (Test-Acc) and inter-trial interval (Test-ITI) sessions (Extended Data Fig. 3d). CS-  
113 responsive cells in the CA3-NR1 KO mice exhibited dramatically decreased  $\text{Ca}^{2+}$   
114 activity relative to the control during the ITI, especially during the first 15 s after the  
115 CS-US presentation (ITI-1), and also during the 30 min rest session (Fig. 2c-e,  
116 Extended Data Fig. 4, Supplementary Movie 1). The activities of US-responsive cells  
117 were comparable between genotypes throughout all sessions (Fig. 2f-h).  $\text{Ca}^{2+}$  activity of  
118 the Test-CS-responsive cells emerged after CS-US presentation (Fig. 2i-k). CS-  
119 responsive and Test-CS-responsive cells in CA3-NR1 KO mice exhibited less activity  
120 during the ITI-1 than the control. Together, these studies indicated that in the CA1,  
121 ablation of CA3 NRs decreases reverberatory activities in current (CS) and future (Test-  
122 CS) CS-responsive cell ensembles, which emerge after termination of sensory stimuli,  
123 without affecting the ensemble structure.

124 The postulated advantage of the reverberatory activity is to prolong the time  
125 window that allows temporal coordination among cell ensembles to integrate stimuli,  
126 leading to associative memory formation<sup>4,6</sup>. To determine if synchronized activity  
127 among cell ensembles increases during the ITI-1, we counted the number of pairwise  
128 synchronized  $\text{Ca}^{2+}$  activities within 500 ms (please refer to Methods) (Extended Data  
129 Fig. 5). CA3-NR1 KO mice exhibited significantly lower pairwise connectivity between  
130 newly generated Test-CS-responsive cells (Test-CS-specific cells) and (CS  $\cup$  US)-  
131 responsive cells during the ITI-1 than the control group. Furthermore, triple  
132 connectivity between CS-, US-, and Test-CS-specific cells in CA3-NR1 KO mice was

133 significantly lower than that of littermate controls only during the ITI-1 (Fig. 2l, m).  
134 Notably, the control group exhibited a positive correlation between the relative degree  
135 of animals' freezing on stimulus and the degree of ITI-1 connectivity. These  
136 characteristic features of connectivity were not observed in shared cells (Fig. 2n).

137 To further assess the representation similarity between CS and US cell  
138 ensembles across CS, US, and ITI-1 sessions, we calculated the Mahalanobis population  
139 vector distance (PVD)<sup>25</sup> following principal component analysis (PCA)-based  
140 dimension reduction<sup>26</sup> and rotation of multidimensional population vectors (one  
141 dimension per cell)<sup>25</sup> (Fig. 2o, p). CS or US ensembles in CA3-NR1 KO mice and  
142 littermate controls exhibited comparable rotation from CS or US to ITI (Fig. 2o, p).  
143 Both CS and US ensemble representations were more stable in littermate control mice  
144 than in CA3-NR1 KO mice across sessions, as demonstrated by small PVD changes  
145 from the stimulus to the ITI session. This suggests that reverberatory activities repeat  
146 CS and US representations. By contrast, ensemble activities exhibited increased  
147 variation across sessions in CA3-NR1 KO mice.

148 The hippocampus processes multimodal information and contains a wide variety  
149 of cell types, such as place and head-direction cells<sup>27</sup>, which could contribute to the  
150 observed reverberatory activity. Thus, we determined if the sensory stimuli alone (CS or  
151 US) triggers reverberatory activity in the hippocampal network using head-fixed mice.  
152 Mice operated for imaging in the CA1 (Fig. 2a) and the CA3 (Extended Data Fig. 7a)  
153 were additionally prepared in such a manner as to allow head fixation on a head-fixed  
154 apparatus consisting of a footshock grid and a light bulb via a holding bar with dental  
155 cement (Fig. 3a). After habituation for 4 days, mice were subjected to a training session  
156 in which they were exposed to the CS or the US alone using the same exposure time and  
157 interval as in the LFC task (Fig. 3b). The training CS- and US-responsive  
158 subpopulations were sorted using the same criteria (2-fold higher responses to stimuli).  
159 The CS-responsive cells in both the CA1 and CA3 of CA3-NR1 KO mice exhibited  
160 significantly lower  $Ca^{2+}$  activity than the littermate controls during the ITI-1 and the  
161 ITI-2 (Fig. 3c-e, i-k, Extended Data Fig. 6, Supplementary movie 2). By contrast, the  
162 US-responsive cells exhibited comparable activities in both genotypes (Fig. 3f-h, l-n).  
163 These findings, combined with the findings in freely moving mice, demonstrate that  
164 during sensory input, CA3 NRs are not important for direct propagation of CS and US

165 information into the hippocampal CA3-CA1 network, but rather are crucial for  
166 reverberation of CS, but not US, representation in this network.

167 We also examined CA3 dynamics during the LFC task in freely moving  
168 conditions (Extended Data Fig. 7a, b, c, f, i). There were no significant differences in  
169 the cell ensemble structure or in the  $\text{Ca}^{2+}$  activities during test sessions between CA3-  
170 NR1 KO mice and littermate controls (Extended Data Fig. 8a-d). In contrast to the CA1,  
171 US input enhanced, rather than inhibited, the  $\text{Ca}^{2+}$  activities of CS- and Test-CS-  
172 responsive cells until the early half period of the ITI-1 (1 to 5 s of 15 s in ITI-1). The  
173 CS- and Test-CS-responsive cells in CA3-NR1 KO mice exhibited significantly lower  
174  $\text{Ca}^{2+}$  activities during the subsequent 9 s of the ITI-1 (6 to 14 s of 15 s in ITI-1) and ITI-  
175 2 sessions (Extended Data Fig. 7c-e, i-k) than the control. Activities of US-responsive  
176 cells were comparable between genotypes (Extended Data Fig. 7f-h). Triple  
177 connectivity was comparable between CA3-NR1 KO and littermate control mice for the  
178 duration of sessions (Extended Data Fig. 7l-n). Mahalanobis PVD analysis revealed  
179 comparable similarities in CS and US ensemble representations across CS-US and ITI  
180 sessions between genotypes (Extended Data Fig. 7o, p). The CS ensemble, but not the  
181 US ensemble, exhibited modest but statistically significant rotation from the stimulus to  
182 the ITI in CA3-NR1 KO mice relative to littermate controls (Extended Data Fig. 7o, p).  
183 These hippocampal CA3 and CA1 imaging results suggested that after termination of  
184 sensory stimuli, the CA3-CA1 pathway acts as a reverberatory network of episodes in a  
185 CA3 NR-dependent manner.

186 Finally, we determined if CA3 reverberatory activity is crucial for the  
187 association between the CS and US. KA1::Cre/CA3-NR1-KO mice were bilaterally  
188 injected in the CA3 with an AAV encoding chicken beta actin (CBA)-FLEX-ArchT-  
189 tdTomato to specifically label CA3 cells with ArchT-tdTomato. Wireless optogenetic  
190 LED (590 nm) cannulae were implanted bilaterally into the CA3 (Fig. 4a, b). CA3  
191 neuronal activity was optogenetically silenced either during the ITI for 10 s immediately  
192 after CS-US presentation (Tr) or during a 10 min rest period after the training session  
193 (HC) in cued-fear conditioning using the same silencing intervals (please refer to  
194 Methods) (Fig. 4c). One day after the training session, mice were subjected to a cued-  
195 fear memory test followed by a contextual fear memory test at a 1 h interval (Fig. 4d, e).  
196 Consistent with the behavioral data in Fig. 1, CA3-NR1 KO mice exhibited impaired



197 cued-fear memory and unchanged contextual memory recall compared with KA1::Cre  
198 mice (KA1 HC-ON vs KO HC-ON) (Fig. 4d, e). Importantly, mice that received  
199 silencing at the time of the early reverberatory phase (Tr-ON) exhibited significantly  
200 decreased cued-fear recall, but similar contextual fear memory in both genotypes  
201 compared with the group silenced after training (HC-ON). Taken together, these  
202 findings suggested that CA3 reverberatory activity is crucial for cued-fear memory  
203 encoding (Fig. 4f).

204 We detected time-limited and CA3 NR-dependent reverberatory activities that  
205 lead to synchronized activity among cell ensembles in the CA1. The CA3 to CA1  
206 network functions as a reverberatory and associative system of stimuli, in which the  
207 CA3 acts as a reverberator and the CA1 functions as both a reverberator and an  
208 integrator of episodes.

209 This prompts the question of why CS and US events must interact during the  
210 reverberatory phase. Simultaneous encoding of multiple stimuli in the brain neural  
211 network is limited by the capacity of cognition<sup>28</sup>. The hippocampus processes distinct  
212 valences, such as contextual and temporal episodes, with distinct cell subpopulations<sup>29-</sup>  
213 <sup>32</sup> and circuits<sup>1-3,8</sup>. The hippocampus could use reverberatory activity to avoid crosstalk  
214 during sensory inputs to store neutral and aversive information separately, and  
215 subsequently link the CS and US during the reverberatory phase. Indeed, a circuit  
216 mechanism in which CA1 activity is temporally regulated by EC input prevents  
217 crosstalk between CS and US stimuli during contextual CS and aversive US  
218 presentations<sup>18</sup>. Thus, the hippocampus functions as a sorter to encode CS and US  
219 independently, and subsequently as a reverberatory integrator to link CS and US.

220 CS-responsive cells occupied about half of Test-CS-responsive cells, that is,  
221 another half of the Test-CS cells emerged after the conditioning. The significant  
222 correlation between relative degree of animal freezing and triple connectivity of non-  
223 shared cells during ITI strongly suggests that, by synchronized activity, CS and US cells  
224 recruit and instruct newly generated Test-CS cells by synchronizing CS and US  
225 information (Extended Data Fig. 9). The hippocampus allocates CS and US events into  
226 distinct cell subpopulations (Fig. 4f). In the amygdala, the CS-responsive cell ensemble  
227 begins to respond to US stimuli across repetitive CS-US presentations and eventually  
228 represents the US to encode cued-fear memory<sup>25</sup>. In addition, the amygdala exhibits



229 greater overlapping in cell populations between training and retrieval sessions than the  
230 CA1<sup>33</sup>. Thus, the amygdala encodes CS-US association by altering the valence  
231 representation of the cell ensemble. Our findings suggest that the hippocampus and  
232 amygdala adopt different strategies to encode distinct aspects of associative memory,  
233 episodic relation and direct linking, respectively.

234 Human studies reveal that in delayed conditioning in which the neutral cue (CS)  
235 is paired with the aversive stimulus (US), the hippocampus and amygdala act in parallel  
236 to associate the CS and US<sup>34,35</sup>. The hippocampus is crucial for declarative association  
237 between the CS and US, while the amygdala is involved in automatic conditioned  
238 responses. In rodents, general theory indicates that the hippocampus is dispensable for  
239 delayed conditioning<sup>36,37</sup>. However, when conditioning stimuli are weaker and do not  
240 trigger the amygdala as robustly, hippocampal contribution to behavior becomes  
241 apparent<sup>22,23,38,39</sup>. We suggest that, similar to humans, the mouse hippocampus  
242 integrates the episodic relation between the CS and US, while the amygdala mediates  
243 direct associations between the CS and US (Extended Data Fig. 10).

244 Consistent with previous reports<sup>1-3</sup>, NR deficiency in the CA3 or CA3 silencing  
245 during reverberation did not impair contextual fear memories after pre-contextual  
246 habituation (Fig. 1e, Fig. 4e, Extended Data Fig. 1a, b). These findings suggest that  
247 reverberation is required for association of novel episodes but not for association with  
248 pre-existing memories.

249 The slow kinetics of NRs are thought to be crucial for holding evoked excitation  
250 within the recurrent network<sup>14,15</sup>. Therefore, reverberatory activity is initially generated  
251 through the CA3 recurrent circuit in an NR-dependent manner. The entorhinal-  
252 hippocampal time-limited gate opens immediately after the sensory stimulus<sup>18,40</sup>, which  
253 promotes propagation to the CA1 and initiates reverberation. Synchronized activities  
254 between CS- and US-responsive cells is stochastically regulated during the ITI,  
255 generating novel Test-CS-responsive cells.

256

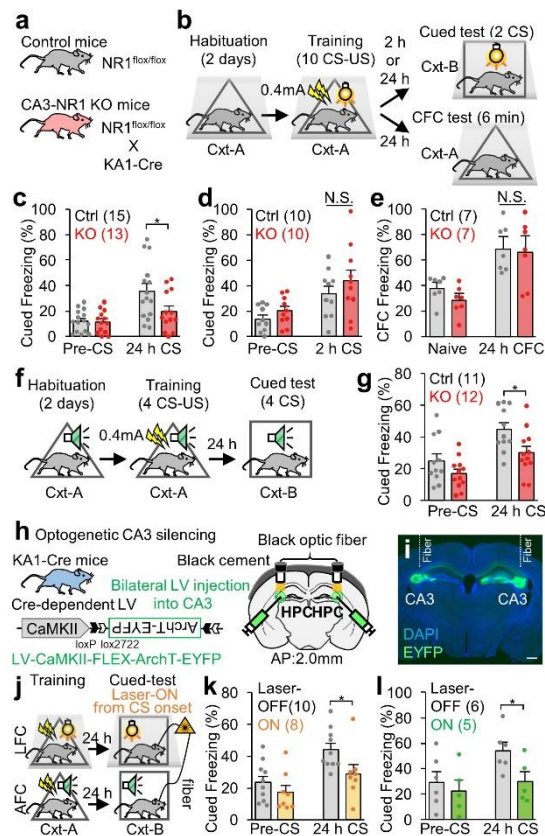

257

258 **Figure 1 | CA3 NRs and CA3 activity are important for cued-fear memory. a,**

259 **Animals used in this study. b, Experimental design for light-cued-fear conditioning**

260 **(LFC) task. c, d, Cued freezing levels during (c) 24 h long-term, and (d) 2 h short-term,**

261 **memory tests. e, Contextual freezing levels during a 24 h long-term memory test in the**

262 **LFC task. f, Experimental design for auditory-cued-fear conditioning (AFC) task. g,**

263 **Cued freezing levels during the 24 h long-term test in AFC task. h, Animal and virus**

264 **vector used for optogenetic CA3 silencing. i, Coronal section of the hippocampus with**

265 **EYFP-expressing cells. Scale bar, 500  $\mu$  m. j, Experimental design for optogenetic**

266 **experiment. k, l Cued freezing levels during the 24 h long-term memory test in the (k)**

267 **LFC, and (l) AFC tasks. c-e, g, k, l, P values determined using an unpaired two-tailed t**

268 **test (\* $P < 0.05$ ). Graphs represent the mean  $\pm$  SEM, and circles within the graphs**

269 **represent individual animals. Numbers in parentheses denote the number of mice in**

270 **each group used for the study. Lightning bolt, footshock; Light bulb, light CS; Cxt,**

271 **context; Speaker, tone CS; HPC, hippocampus; AP, anterior-posterior; N.S., not**

272 **significant.**

273

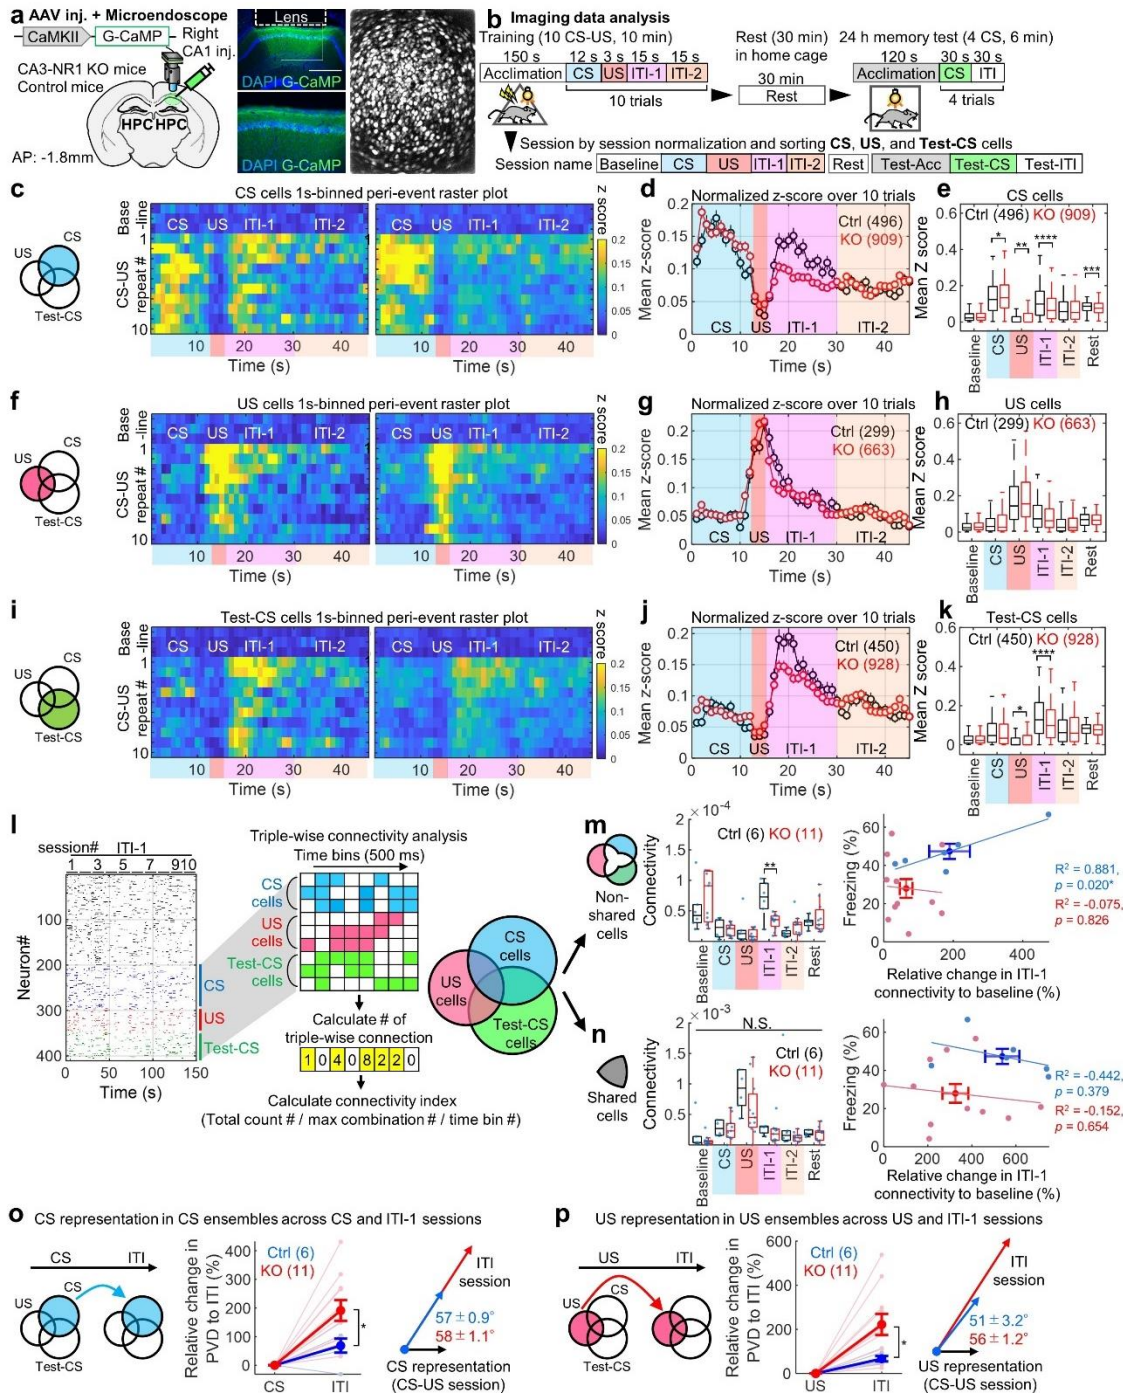

274

275

276

277

278

279

280

**Figure 2 | CA3 NRs are involved in reverberatory and synchronized activity, but not sensory propagation, in CS- and Test-CS-responsive ensembles.** **a**, Left, experimental design. Right, coronal section of the hippocampus with G-CaMP expression, GRIN lens implantation, and stacked dF/F image acquired using a microendoscope over entire recording sessions of hippocampal imaging. Scale bar, 500  $\mu$  m. **b**, Imaging data analysis scheme. In each cell, Ca<sup>2+</sup> data is classified into nine

281 sessions, and the calculated mean z-score is considered to represent responsiveness and  
282 sorted into CS-, US-, and Test-CS-responsive subpopulations. **c**, Venn diagrams  
283 representing CS ensembles. Peri-event raster plots during the training session in CS-  
284 responsive subpopulations of wild-type littermate (left) control and (right) KO mice.  
285 Each short vertical tick represents a 1 s change of mean z-score across baseline and ten  
286 CS-US pairings.  $\text{Ca}^{2+}$  activities were aligned at the time that CS-US stimuli were  
287 delivered. The color code represents mean z-score. **d**, Averaged z-score plots over ten  
288 CS-US pairings in CS-responsive subpopulations. **e**, Box plots comparing mean z-  
289 scores between genotypes in each session. **f**, Venn diagrams representing US ensembles.  
290 Peri-event raster plots during the training session in US-responsive subpopulations of  
291 wild-type littermate (left) control and (right) KO mice. Each short vertical tick  
292 represents a 1 s change of mean z-score across baseline and ten CS-US pairings.  $\text{Ca}^{2+}$   
293 activities were aligned at the time that CS-US stimuli were delivered. The color code  
294 represents mean z-score. **g**, Averaged z-score plots over ten CS-US pairings in US-  
295 responsive subpopulations. **h**, Box plots comparing mean z-scores between genotypes in  
296 each session. **i**, Venn diagrams representing Test-CS ensembles. Peri-event raster plots  
297 during the training session in Test-CS-responsive subpopulations of wild-type littermate  
298 (left) control and (right) KO mice. Each short vertical tick represents a 1 s change of  
299 mean z-score across baseline and ten CS-US pairings.  $\text{Ca}^{2+}$  activities were aligned at the  
300 time that CS-US stimuli were delivered. The color code represents mean z-score. **j**,  
301 Averaged z-score plots over ten CS-US pairings in Test-CS-responsive subpopulations.  
302 **k**, Box plots comparing mean z-scores between genotypes in each session. **l**, Left,  
303 representative binarized raster plots of  $\text{Ca}^{2+}$  activity across ten ITI-1 sessions in control  
304 animals. Right, magnified raster plots focusing on CS-, US-, and Test-CS-responsive  
305 subpopulations and scheme for connectivity analysis. This analysis calculates  
306 connectivity by normalizing the number of synchronized connections every 500 ms  
307 among the three subpopulations in each session. **m**, **n**, Box plots comparing mean  
308 connectivity between genotypes in each session. **o**, **p**, Mahalanobis PVD and rotation  
309 between CS and ITI-1 sessions in the (**o**) CS-responsive ensemble and between US and  
310 ITI-1 sessions in the (**p**) US-responsive ensemble. Numbers in parentheses denote the  
311 number of (**d**, **e**, **g**, **h**, **j**, **k**) cells or (**m**, **n**, **o**, **p**) mice in each group used for the studies.  
312 *P* values were determined using a (**e**, **h**, **k**) Wilcoxon rank sum test, (**m**, **n**, **o**, **p**)

313 Unpaired  $t$  test, or (**m, n**) Pearson correlation ( $*P < 0.05$ ,  $**P < 0.01$ ,  $***P < 0.001$ ,  
314  $****P < 0.0001$ ). Box plots represent median, first, and third quantiles, and minimum  
315 and maximum values. Graphs represent means  $\pm$  SEM.

316



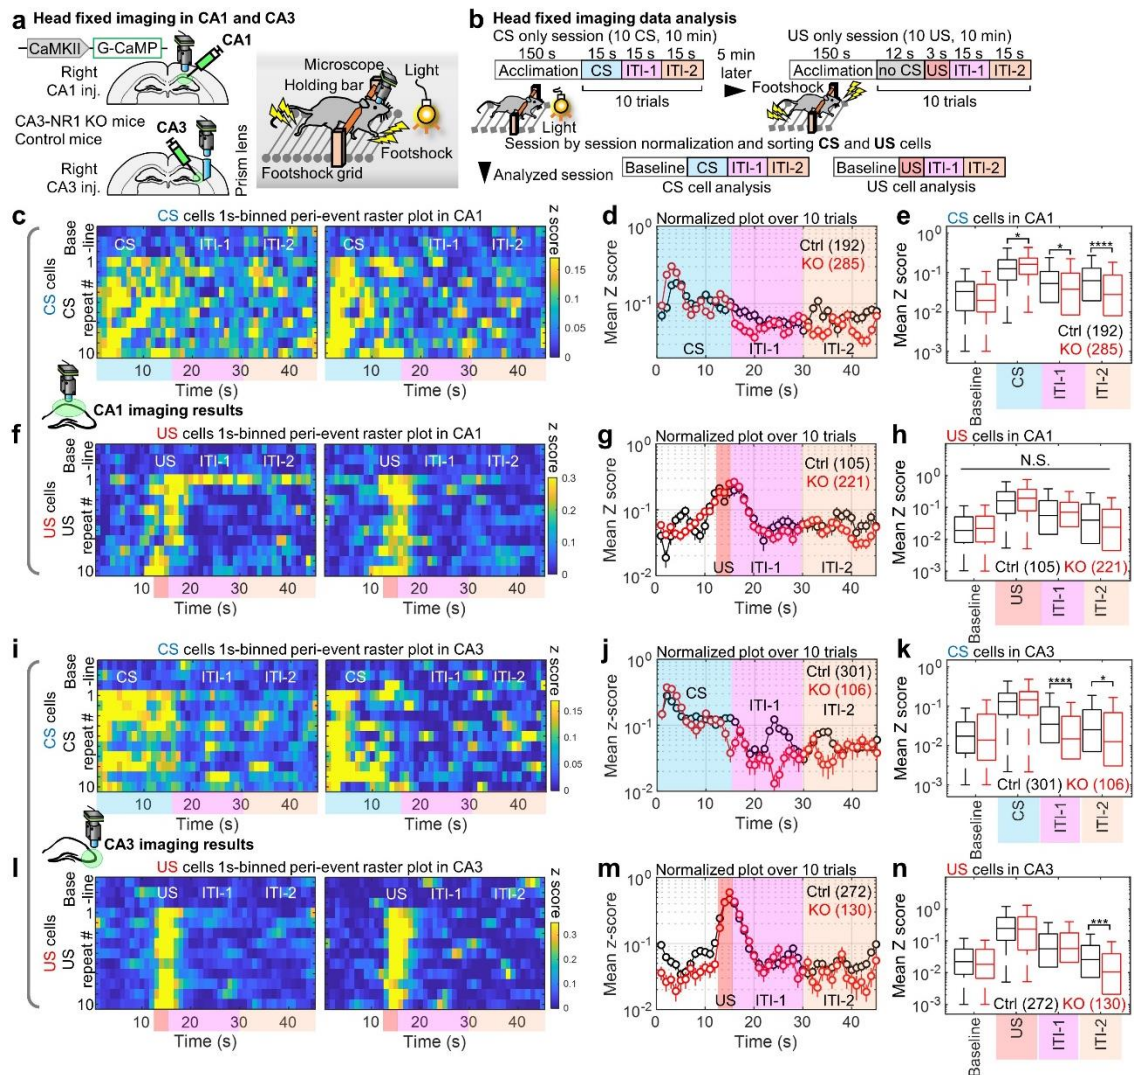

317

318 **Figure 3 | CA3 NRs-dependent reverberation by single stimuli in the hippocampal**  
 319 **network under head-fixed conditions.** **a**, Left, experimental design. Right, schema for  
 320 head-fixed imaging. The same footshock grid and light bulb were used in free-moving  
 321 and head-fixed imaging experiments. **b**, Imaging data analysis scheme. In each cell,  
 322  $\text{Ca}^{2+}$  data are classified into four sessions, and the calculated mean z-score, considered  
 323 to represent responsiveness, is sorted into CS- and US-responsive subpopulations. **c**,  
 324 Peri-event raster plots during single CS presentation session in CA1 subpopulations of  
 325 (left) control and (right) KO mice. Each short vertical tick represents a 1 s change of  
 326 mean z-score across baseline, and CS presentations.  $\text{Ca}^{2+}$  activities are aligned at the  
 327 time at which stimuli were delivered. The color code indicates mean z-score. **d**,  
 328 Averaged z-score plots over ten CS presentations in CA1 CS-responsive subpopulations.  
 329 **e**, Box plots comparing mean z-scores between genotypes in each session. Numbers in

330 parentheses denote the number of cells in each group used for the study. **f**, Peri-event  
331 raster plots during single US presentation session in CA1 subpopulations of (left)  
332 control and (right) KO mice. Each short vertical tick represents a 1 s change of mean z-  
333 score across baseline, and US presentations.  $\text{Ca}^{2+}$  activities are aligned at the time at  
334 which stimuli were delivered. The color code indicates mean z-score. **g**, Averaged z-  
335 score plots over ten US presentations in CA1 US-responsive subpopulations. **h**, Box  
336 plots comparing mean z-scores between genotypes in each session. Numbers in  
337 parentheses denote the number of cells in each group used for the study. **i**, Peri-event  
338 raster plots during single CS presentation session in CA3 subpopulations of (left)  
339 control and (right) KO mice. Each short vertical tick represents a 1 s change of mean z-  
340 score across baseline, and CS presentations.  $\text{Ca}^{2+}$  activities are aligned at the time at  
341 which stimuli were delivered. The color code indicates mean z-score. **j**, Averaged z-  
342 score plots over ten CS presentations in CA3 CS-responsive subpopulations. **k**, Box  
343 plots comparing mean z-scores between genotypes in each session. Numbers in  
344 parentheses denote the number of cells in each group used for the study. **l**, Peri-event  
345 raster plots during single US presentation session in CA3 subpopulations of (left)  
346 control and (right) KO mice. Each short vertical tick represents a 1 s change of mean z-  
347 score across baseline, and US presentations.  $\text{Ca}^{2+}$  activities are aligned at the time at  
348 which stimuli were delivered. The color code indicates mean z-score. **m**, Averaged z-  
349 score plots over ten US presentations in CA3 US-responsive subpopulations. **n**, Box  
350 plots comparing mean z-scores between genotypes in each session. Numbers in  
351 parentheses denote the number of cells in each group used for the study. Data were  
352 acquired from Ctrl ( $n = 2$  mice) and KO ( $n = 2$  mice) groups for CA1 imaging, and from  
353 Ctrl ( $n = 4$ ) and KO ( $n = 2$  mice) groups for CA3 imaging.  $P$  values were determined  
354 using (e, h, k, n) a Wilcoxon rank sum test ( $*P < 0.05$ ,  $**P < 0.01$ ,  $***P < 0.001$ ,  
355  $****P < 0.0001$ ). Box plots represent the median, first, and third quantiles, and  
356 minimum and maximum values. Graphs represent means  $\pm$  SEM.

357

358

359



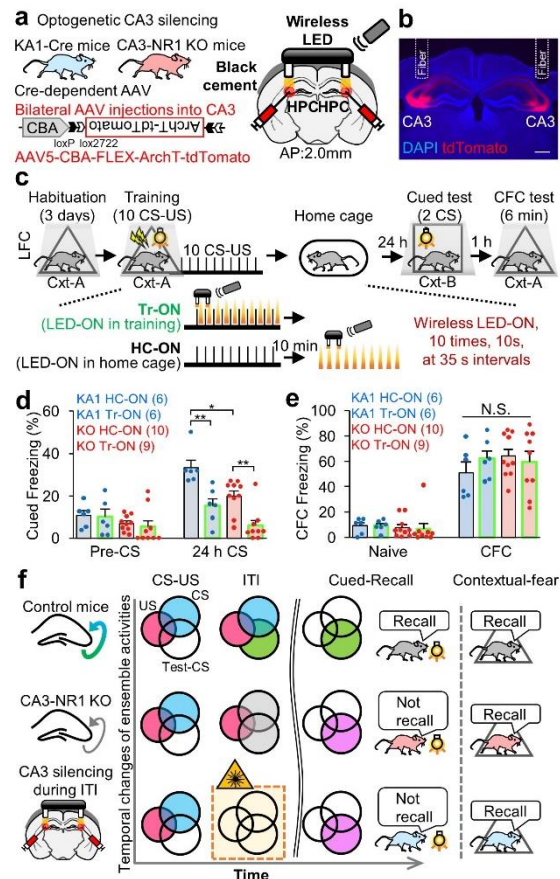

360

361 **Figure 4 | CA3-CA1 pathway activity after termination of sensory stimuli is crucial**

362 **for cued-fear memory encoding but not for contextual fear memory. a,**

363 **Experimental design. b,** Coronal section of the hippocampus with tdTomato expression

364 **and fiber implantation targeting CA3. Scale bar, 500  $\mu$  m. c,** Scheme for optogenetic

365 **manipulation. After the habituation session, mice were subjected to ten CS-US pairings**

366 **in a training session. The CA3-CA1 pathway was silenced ten times for 10 s at 35 s**

367 **intervals, during either the ITI phase following CS-US presentation (Tr-ON) or during**

368 **resting in the home cage 10 min after the training session (HC-ON). On the next day,**

369 **mice were tested for cued freezing and contextual freezing. d,** Cued freezing levels

370 **during the 24 h long-term memory test. e,** Contextual freezing levels during the 24 h

371 **long-term memory test. *P* values were determined using a two-way analysis of variance**

372 **(ANOVA) with the Tukey–Kramer test (\**P* < 0.05, \*\**P* < 0.01). ANOVA of cued**

373 **freezing level: genotype. Graphs represent means  $\pm$  SEM, with circles indicating**

374 **individual animals. f,** Summarized scheme of imaging and behavioral results in the

375 **study. Venn diagrams of temporal changes in ensemble activities corresponding to CS,**

376 US, and Test-CS. Filled circles with color indicate the activated ensemble in each  
377 behavioral session of experimental groups. The CA3-NR1 KO group exhibited less  
378 activity in the CS- and Test-CS-responsive ensembles during ITI and failed cued-fear  
379 memory recalls. Numbers in parentheses denote the number of mice in each group used  
380 for the study. Lightning bolt, footshock; Light bulb, light CS; Cxt, context; HPC,  
381 hippocampus; AP, anterior-posterior; N.S., not significant.

382

383

384 **References**

385

- 386 1 Nakazawa, K. *et al.* Hippocampal CA3 NMDA receptors are crucial for memory  
387 acquisition of one-time experience. *Neuron* **38**, 305–315, doi:10.1016/s0896-  
388 6273(03)00165-x (2003).
- 389 2 Nakashiba, T., Young, J. Z., McHugh, T. J., Buhl, D. L. & Tonegawa, S.  
390 Transgenic inhibition of synaptic transmission reveals role of CA3 output in  
391 hippocampal learning. *Science* **319**, 1260–1264, doi:10.1126/science.1151120  
392 (2008).
- 393 3 McHugh, T. J. & Tonegawa, S. CA3 NMDA receptors are required for the rapid  
394 formation of a salient contextual representation. *Hippocampus* **19**, 1153–1158,  
395 doi:10.1002/hipo.20684 (2009).
- 396 4 Hebb, D. O. *The organization of behavior: a neuropsychological theory.* (J.  
397 Wiley; Chapman & Hall, 1949).
- 398 5 Johnson, L. R., Ledoux, J. E. & Doyere, V. Hebbian reverberations in  
399 emotional memory micro circuits. *Front Neurosci* **3**, 198–205,  
400 doi:10.3389/neuro.01.027.2009 (2009).
- 401 6 Yuste, R. From the neuron doctrine to neural networks. *Nat Rev Neurosci* **16**,  
402 487–497, doi:10.1038/nrn3962 (2015).
- 403 7 Squire, L. R., Stark, C. E. & Clark, R. E. The medial temporal lobe. *Annu Rev*  
404 *Neurosci* **27**, 279–306, doi:10.1146/annurev.neuro.27.070203.144130 (2004).
- 405 8 Suh, J., Rivest, A. J., Nakashiba, T., Tominaga, T. & Tonegawa, S. Entorhinal  
406 cortex layer III input to the hippocampus is crucial for temporal association  
407 memory. *Science* **334**, 1415–1420, doi:10.1126/science.1210125 (2011).
- 408 9 Kesner, R. P. A process analysis of the CA3 subregion of the hippocampus.  
409 *Front Cell Neurosci* **7**, 78, doi:10.3389/fncel.2013.00078 (2013).
- 410 10 Nakazawa, K. *et al.* Requirement for hippocampal CA3 NMDA receptors in  
411 associative memory recall. *Science* **297**, 211–218, doi:10.1126/science.1071795  
412 (2002).
- 413 11 McNaughton, B. L. & Morris, R. G. Hippocampal synaptic enhancement and  
414 information storage within a distributed memory system. *Trends in*  
415 *neurosciences* **10**, 408–415 (1987).
- 416 12 Wallenstein, G. V., Eichenbaum, H. & Hasselmo, M. E. The hippocampus as an  
417 associator of discontiguous events. *Trends Neurosci* **21**, 317–323,  
418 doi:10.1016/s0166-2236(97)01220-4 (1998).
- 419 13 Levy, W. B. A sequence predicting CA3 is a flexible associator that learns  
420 and uses context to solve hippocampal-like tasks. *Hippocampus* **6**, 579–590,  
421 doi:10.1002/(SICI)1098-1063(1996)6:6<579::AID-HIP03>3.0.CO;2-C (1996).
- 422 14 Wang, X. J. Synaptic basis of cortical persistent activity: the importance of  
423 NMDA receptors to working memory. *J Neurosci* **19**, 9587–9603 (1999).
- 424 15 Wang, X. J. Synaptic reverberation underlying mnemonic persistent activity.  
425 *Trends Neurosci* **24**, 455–463, doi:10.1016/s0166-2236(00)01868-3 (2001).
- 426 16 Kishimoto, Y., Nakazawa, K., Tonegawa, S., Kirino, Y. & Kano, M. Hippocampal  
427 CA3 NMDA receptors are crucial for adaptive timing of trace eyeblink  
428 conditioned response. *J Neurosci* **26**, 1562–1570, doi:10.1523/JNEUROSCI.4142-  
429 05.2006 (2006).
- 430 17 Rebola, N., Carta, M. & Mulle, C. Operation and plasticity of hippocampal CA3  
431 circuits: implications for memory encoding. *Nat Rev Neurosci* **18**, 208–220,  
432 doi:10.1038/nrn.2017.10 (2017).

- 433 18 Lovett-Barron, M. *et al.* Dendritic inhibition in the hippocampus supports  
434 fear learning. *Science* **343**, 857–863, doi:10.1126/science.1247485 (2014).
- 435 19 Newton, J. R., Ellsworth, C., Miyakawa, T., Tonegawa, S. & Sur, M.  
436 Acceleration of visually cued conditioned fear through the auditory pathway.  
437 *Nature neuroscience* **7**, 968–973 (2004).
- 438 20 Fanselow, M. S. Factors governing one-trial contextual conditioning. *Animal*  
439 *Learning & Behavior* **18**, 264–270 (1990).
- 440 21 Ohkawa, N. *et al.* Artificial association of pre-stored information to  
441 generate a qualitatively new memory. *Cell Rep* **11**, 261–269,  
442 doi:10.1016/j.celrep.2015.03.017 (2015).
- 443 22 Maren, S., Aharonov, G. & Fanselow, M. S. Neurotoxic lesions of the dorsal  
444 hippocampus and Pavlovian fear conditioning in rats. *Behav Brain Res* **88**, 261–  
445 274, doi:10.1016/s0166-4328(97)00088-0 (1997).
- 446 23 Quinn, J. J., Wied, H. M., Ma, Q. D., Tinsley, M. R. & Fanselow, M. S. Dorsal  
447 hippocampus involvement in delay fear conditioning depends upon the strength  
448 of the tone-footshock association. *Hippocampus* **18**, 640–654,  
449 doi:10.1002/hipo.20424 (2008).
- 450 24 Moita, M. A., Rosis, S., Zhou, Y., LeDoux, J. E. & Blair, H. T. Hippocampal  
451 place cells acquire location-specific responses to the conditioned stimulus  
452 during auditory fear conditioning. *Neuron* **37**, 485–497, doi:10.1016/s0896-  
453 6273(03)00033-3 (2003).
- 454 25 Grewe, B. F. *et al.* Neural ensemble dynamics underlying a long-term  
455 associative memory. *Nature* **543**, 670–675, doi:10.1038/nature21682 (2017).
- 456 26 Kumar, P., Kanaujia, S. K., Singh, A. & Pradhan, A. In vivo detection of oral  
457 precancer using a fluorescence-based, in-house-fabricated device: a  
458 Mahalanobis distance-based classification. *Lasers Med Sci* **34**, 1243–1251,  
459 doi:10.1007/s10103-019-02720-9 (2019).
- 460 27 O’Keefe, J. & Krupic, J. Do hippocampal pyramidal cells respond to nonspatial  
461 stimuli? *Physiol Rev* **101**, 1427–1456, doi:10.1152/physrev.00014.2020 (2021).
- 462 28 Buschman, T. J., Siegel, M., Roy, J. E. & Miller, E. K. Neural substrates of  
463 cognitive capacity limitations. *Proc Natl Acad Sci U S A* **108**, 11252–11255,  
464 doi:10.1073/pnas.1104666108 (2011).
- 465 29 Nomoto, M. *et al.* Cellular tagging as a neural network mechanism for  
466 behavioural tagging. *Nat Commun* **7**, 12319, doi:10.1038/ncomms12319 (2016).
- 467 30 Khalaf, O. *et al.* Reactivation of recall-induced neurons contributes to  
468 remote fear memory attenuation. *Science* **360**, 1239–1242,  
469 doi:10.1126/science.aas9875 (2018).
- 470 31 Lacagnina, A. F. *et al.* Distinct hippocampal engrams control extinction and  
471 relapse of fear memory. *Nat Neurosci* **22**, 753–761, doi:10.1038/s41593-019-  
472 0361-z (2019).
- 473 32 Sun, X. *et al.* Functionally Distinct Neuronal Ensembles within the Memory  
474 Engram. *Cell* **181**, 410–423 e417, doi:10.1016/j.cell.2020.02.055 (2020).
- 475 33 Tayler, K. K., Tanaka, K. Z., Reijmers, L. G. & Wiltgen, B. J. Reactivation  
476 of neural ensembles during the retrieval of recent and remote memory. *Curr*  
477 *Biol* **23**, 99–106, doi:10.1016/j.cub.2012.11.019 (2013).
- 478 34 Bechara, A. *et al.* Double dissociation of conditioning and declarative  
479 knowledge relative to the amygdala and hippocampus in humans. *Science* **269**,  
480 1115–1118, doi:10.1126/science.7652558 (1995).
- 481 35 Clark, R. E. & Squire, L. R. Classical conditioning and brain systems: the  
482 role of awareness. *Science* **280**, 77–81, doi:10.1126/science.280.5360.77 (1998).

- 483 36 Kim, J. J. & Fanselow, M. S. Modality-specific retrograde amnesia of fear.  
484 *Science* **256**, 675–677, doi:10.1126/science.1585183 (1992).
- 485 37 Phillips, R. G. & LeDoux, J. E. Differential contribution of amygdala and  
486 hippocampus to cued and contextual fear conditioning. *Behav Neurosci* **106**,  
487 274–285, doi:10.1037//0735-7044.106.2.274 (1992).
- 488 38 Seidenbecher, T., Laxmi, T. R., Stork, O. & Pape, H. C. Amygdalar and  
489 hippocampal theta rhythm synchronization during fear memory retrieval.  
490 *Science* **301**, 846–850, doi:10.1126/science.1085818 (2003).
- 491 39 Narayanan, R. T. *et al.* Dissociated theta phase synchronization in amygdalo-  
492 hippocampal circuits during various stages of fear memory. *Eur J Neurosci* **25**,  
493 1823–1831, doi:10.1111/j.1460-9568.2007.05437.x (2007).
- 494 40 Basu, J. *et al.* Gating of hippocampal activity, plasticity, and memory by  
495 entorhinal cortex long-range inhibition. *Science* **351**, aaa5694,  
496 doi:10.1126/science.aaa5694 (2016).
- 497
- 498

499 **Methods**

500

501 **Mice**

502 Male CA3-NR1 KO mice (C57BL/6J background) and their floxed-NR1 littermate  
503 controls were used for behavioral, imaging, and optogenetic experiments. Male  
504 KA1::Cre mice were used for optogenetic experiments. CA3-NR1 KO mice were  
505 generated by crossing floxed-NR1 and KA1::Cre transgenic mice. Mice were  
506 maintained on a 12 h light-dark cycle at  $24^{\circ}\text{C} \pm 3^{\circ}\text{C}$  and  $55\% \pm 5\%$  humidity with  
507 standard laboratory diet and tap water ad libitum. All mice were aged 16–26 weeks at  
508 the time of behavioral experiments. All procedures involving the use of animals  
509 complied with the guidelines of the National Institutes of Health and were approved by  
510 the Animal Care and Use Committee of the University of Toyama, Toyama, Japan.

511

512 **Viral constructs**

513 For the *in vivo*  $\text{Ca}^{2+}$  imaging experiment, a recombinant Adeno-Associated Virus  
514 (AAV) vector encoding AAV<sup>9</sup>-CaMKII::G-CaMP7 (Titer:  $9.4 \times 10^{12}$  vg/mL) after 40-  
515 fold dilution with phosphate buffered saline (PBS) (T900; Takara Bio, Inc., Japan) was  
516 used<sup>41</sup>. For optogenetic silencing during the training session, AAV encoding AAV5-  
517 CBA-FLEX-ArchT-tdTomato (Titer:  $1.3 \times 10^{13}$  GC/mL) (#28305; Addgene, USA) after  
518 10-fold dilution with PBS was used. For optogenetic silencing during the test session,  
519 lentivirus (LV) encoding CaMKII-FLEX-eArch3.0-EYFP (Titer:  $5 \times 10^9$  IU mL<sup>-1</sup>)  
520 without dilution was used. The LV was prepared as described previously<sup>29</sup>, according to  
521 the protocol developed by K. Deisseroth.

522

523 **Stereotaxic surgery for optogenetic and imaging studies**

524 Stereotaxic surgery and optic fiber placement were conducted as described previously<sup>29</sup>.  
525 Prior to surgery, mice were anesthetized with intraperitoneal injection of a three-drug  
526 combination: 0.75 mg/kg medetomidine (Domitor; Nippon Zenyaku Kogyo Co., Ltd.,  
527 Japan); 4.0 mg/kg midazolam (Fuji Pharma Co., Ltd., Japan); and 5.0 mg/kg  
528 butorphanol (Vetorphale; Meiji Seika Pharma Co., Ltd., Japan). After surgery, an  
529 intramuscular injection of 1.5 mg/kg atipamezole (Antisedan; Nippon Zenyaku Kogyo),  
530 a medetomidine antagonist, was administered to reverse sedation. Mice were placed on

531 a stereotaxic apparatus (Narishige, Japan), and subsequently bilaterally injected with LV  
532 or AAV solution into the dorsal hippocampal CA3 (from bregma: +2.0 mm  
533 anteroposterior [AP],  $\pm 2.2$  mm mediolateral [ML]; from dura: +1.8 mm dorsoventral  
534 [DV]). All virus injections were conducted using a 10  $\mu$ L Hamilton syringe (80030;  
535 Hamilton, USA) fitted with a mineral oil-filled glass needle and wired to an automated  
536 motorized microinjector IMS-20 (Narishige). The glass injection tip was maintained  
537 before and after injection at the target coordinates for 5 min.

538 For the wired optogenetic experiment, mice were bilaterally injected with 500  
539 nL LV solution at 100 nL  $\text{min}^{-1}$  into the CA3, and bilaterally implanted with guide  
540 cannulas targeting the CA3 (from bregma: -2.0 mm AP,  $\pm 2.2$  mm ML; from dura: +1.3  
541 mm DV; C313GS-5/SPC, 22-gauge; Plastics One, USA). Dummy cannulas  
542 (C313IDCS-5/SPC, zero projection, Plastics One) were then inserted into guide  
543 cannulas to protect these guide cannula tubes from dust.

544 For the wireless optogenetic experiment, a wireless optogenetics system,  
545 Teleopto (Bio Research Center, Japan), was used<sup>42</sup>. Mice were bilaterally injected with  
546 500 nL AAV solution at 100 nL  $\text{min}^{-1}$  into the CA3 and implanted with a dual-LED  
547 cannula (fiber diameter, 500  $\mu$ m; fiber length, 3.3 mm; bilateral, 590 nm, 10 mW)  
548 targeting the CA3 (from bregma: -2.0 mm AP,  $\pm 2.2$  mm ML; from dura: +1.2 mm DV).  
549 Micro-screws were fixed near the bregma and lambda, and guide cannulas were fixed in  
550 position using dental cement (Provinice; Shofu, Inc., Japan) mixed with 5% carbon  
551 powder (484164; Sigma, USA). Mice were allowed to recover from surgery for 4 weeks  
552 in their home cages before behavioral experiments were initiated.

553 For the  $\text{Ca}^{2+}$  imaging experiment, surgery was conducted as described previously  
554 with modifications<sup>41</sup>. Mice were unilaterally injected with 500 nL AAV9-CaMKII::G-  
555 CaMP7 at 100 nL  $\text{min}^{-1}$  into the right hippocampal CA1 (from bregma: -2.0 mm AP,  
556 +1.4 mm ML, +1.4 mm DV) or CA3 (from bregma: -2.0 mm AP, +2.2 mm ML; from  
557 dura: +1.8 mm DV). After 1 week of recovery from AAV injection surgery,  
558 anesthetized mice were placed back onto a stereotaxic apparatus to implant a gradient  
559 index (GRIN) lens into CA1 or CA3. A craniotomy (CA1, approximately 1.8 mm in  
560 diameter; CA3, approximately a 2.0  $\times$  2.0 mm square) was performed centered over the  
561 injection site, and the neocortex and corpus callosum above the alveus overlying the  
562 dorsal hippocampal CA1 or CA3 were aspirated under constant irrigation with saline



563 using a 26-gauge flat-blunted needle tip. Saline was applied to control bleeding. A  
564 cylindrical GRIN lens (diameter, 1.0 mm; length, 4 mm; Inscopix, USA) and prism  
565 GRIN lens (diameter, 1.0 mm; length, 4 mm with prism lens; Inscopix) were attached to  
566 the alveus and additionally squeezed 10–30  $\mu$  m using handmade forceps attached to a  
567 manipulator (Narishige) for CA1 and CA3 imaging. Emulsified low-temperature bone  
568 wax was applied to seal the gaps between the GRIN lenses and the skull, and the lens  
569 was then anchored in place using dental cement mixed with 5% carbon powder (464164,  
570 Sigma) as described above. After the surgery, Ringer's solution (0.5 mL/mouse, i.p.;  
571 Otsuka, Japan) was injected, and atipamezole was administered as described above.  
572 Mice were maintained in individual cages after surgery. Three weeks after GRIN lens  
573 implantation, mice were anesthetized and placed back onto the stereotaxic apparatus to  
574 set a baseplate (Inscopix). A Gripper (Inscopix) holding a baseplate attached to a  
575 miniature microscope (nVista 3, Inscopix) was lowered over the implanted GRIN lens  
576 until visualization of clear vasculature was possible, indicating the optimum focal plane.  
577 Carbon-containing dental cement was then applied to fix the baseplate in position and  
578 preserve the optimal focal plane. Mice recovered from surgery in their home cages at  
579 least for 1 week before beginning behavioral imaging experiments.

580 For CA1 and CA3 head-fixed imaging experiments, mice that had undergone the  
581 surgery until the step of baseplate setting were anesthetized and placed back onto a  
582 stereotaxic apparatus, and mice were removably attached to a holding bar with a dental  
583 cement. The cut tips of a PCR tube held with ear bar for stereotaxic (Narishige)  
584 bilaterally were moved closer to the face between the eye and ear, and then the tips were  
585 fixed with dental cement, enabling the stereotaxic device to hold the mouse head on the  
586 apparatus.

587

### 588 **Behavioral analysis**

589 All mice were numbered and randomly assigned to each experimental group before the  
590 experiments, with the exception of an imaging experiment. All behavioral experiments  
591 were performed and analyzed by an investigator blinded to experimental conditions  
592 with the exception of imaging experiment. For all behavioral procedures, animals in  
593 their home cages were moved on a rack to a resting room next to the behavioral testing

594 room and left undisturbed for at least 30 min before each behavioral experiment. All  
595 behavioral chambers were cleaned after each behavioral session. After all the  
596 optogenetic experiments were completed, the injection sites were histologically verified.  
597 Data were excluded from behavior analyses if the animals exhibited abnormal behavior  
598 after surgery, the target area was missed, or the bilateral expression of the virus was  
599 inadequate. All behavioral sessions were conducted using a video tracking system  
600 (Muromachi Kikai, Japan) to measure the freezing of mice. All sessions were recorded  
601 using Bandicam software (Bandisoft, Korea) or AG-desktop recorder software (T. Ishii,  
602 Japan). The cumulative duration (s) spent in the complete absence of movement, except  
603 for respiration, was considered to be the freezing duration. Automated scoring of the  
604 freezing response was initiated after 1 s of persistent freezing behavior, and the freezing  
605 data of optogenetic and imaging experiments were manually reanalyzed by other non-  
606 behavioral operators (E.M. and R.O.S.) in blinded condition with the same criteria, to  
607 exclude the effect of optogenetic device (optic fiber for wired optogenetics or Teleopt  
608 battery for wireless optogenetics) and calcium imaging device attachments on  
609 automated animal tracking.

610

### 611 **Light fear conditioning (LFC) task**

612 LFC was conducted under dim light (approximately 2 lx) conditions as described  
613 previously with some modifications<sup>19</sup>. Two distinct contexts were used for LFC  
614 habituation, training, and testing sessions. For habituation, training, and contextual fear  
615 test sessions, a triangle-type chamber (context A: Cxt-A) with black stripe patterns was  
616 used. This chamber was a triangular prism (one side  $\times$  height: 180  $\times$  250 mm), with a  
617 transparent acrylic board for the front wall, black stripe-patterned side walls with an 8  
618 W white light bulb, and a floor made from 26 stainless steel rods. For cued-fear test  
619 sessions, a quadrangular prism chamber (width  $\times$  depth  $\times$  height: 190  $\times$  180  $\times$  420 mm,  
620 respectively) was used (context B: Cxt-B), with a transparent acrylic front board and  
621 white side walls with an 8 W white light bulb and an asperity white floor. Before each  
622 test session, the white floor was scented with 0.25% benzaldehyde water. For the  
623 habituation session, mice were allowed to explore the Ctx-A apparatus for 6 min per  
624 day for 2 days (non-operated, wired optogenetic, and imaging experiments) or for 3  
625 days (wireless optogenetic experiment), and were then returned to their home cages.

626 For the training session 1 day after the habituation session, mice were  
627 conditioned in Cxt-A by ten pairings of the light-conditioned stimulus (CS) for 15 s  
628 with the unconditioned stimulus (US) (3 s footshock at the end of CS presentation, 0.4  
629 mA) at 30 s intervals after a 150 s acclimation time. For the light-cued-fear memory test  
630 session, which was conducted 2 and 24 h after conditioning, different experimental  
631 mice were placed in Cxt-B for 120 s and then received two presentations of CS for 30 s  
632 at intervals of 30 s. For the contextual fear memory test session, 24 h after conditioning,  
633 different experimental mice were placed in Cxt-A for 360 s (non-operated animal  
634 experiments), while the same mice being tested for cued-fear memory were placed in  
635 Cxt-A for 360 s 1 hour after the light-cued-fear memory test (wireless optogenetic  
636 experiment).

637

#### 638 **Auditory fear conditioning (AFC) task**

639 AFC was conducted under normal light conditions as described previously with some  
640 modifications<sup>43</sup>. Two distinct contexts, described above, were used for AFC habituation,  
641 training, and testing sessions. For habituation and training sessions, a triangle-type  
642 chamber, Cxt-A, was used. This chamber had a transparent acrylic board for the front  
643 wall, black stripe-patterned side walls with a speaker, and a floor made from 26  
644 stainless steel rods. For cued-fear test sessions, a quadrangular prism chamber, Cxt-B,  
645 was used. This chamber had a transparent acrylic front board and white side walls with  
646 a speaker and an asperity white floor.

647 For the 2 day habituation session, mice received four tone CS presentations (CS:  
648 30 s at intervals of 30 s, 7 kHz, and 75 dB) after 120 s of exposure to Cxt-A, and then  
649 were returned to their home cages. For training sessions 1 day after the habituation  
650 session, mice were conditioned in Cxt-A by four pairings of the tone CS for 30 s with  
651 the US (1 s footshock at the end of CS presentation, 0.4 mA) at 30 s intervals after a 120  
652 s acclimation time. For the tone-cued-fear memory test session, 24 h after conditioning,  
653 mice were placed in Cxt-B for 120 s and then subjected to four CS presentations for 30  
654 s at intervals of 30 s.

655

#### 656 **Pre-exposure facilitated contextual fear conditioning (pre-exposure facilitated 657 CFC) task**

658 Pre-exposure-facilitated CFC was conducted as described previously with some  
659 modifications<sup>21</sup>. A quadrangular prism chamber, Cxt-B, with a footshock grid as  
660 described above was used. On day 1, mice were placed in Cxt-B for 6 min and then  
661 were returned to their home cages. On day 2, mice were placed again in Cxt-B and  
662 immediately given the US (1 s footshock); kept for 10 s in the context; and then  
663 returned to their home cage. On day 3, to assess contextual freezing, mice were placed  
664 in Cxt-B again for 360 s.

665

### 666 **Optogenetic experiments**

667 Wired and wireless optogenetic experiments were conducted as described previously  
668 with some modifications<sup>29</sup>. For the wired optogenetic experiment, on the recall session,  
669 mice were anesthetized with 3% isoflurane for placement of the optical fiber units, and  
670 dummy cannulae were removed from the guide cannulae. The black-stained optical  
671 fiber unit, comprising a plastic cannula body, was a two-branch-type unit with a black-  
672 stained optic fiber diameter of 0.250 mm (COME2-DF2-250; Lucir, Japan). The optical  
673 fiber unit was inserted into the guide cannulae, and the guide cannulae and the optical  
674 fiber unit were tightly connected with the optical fiber caps (303/OFC, Plastics One).  
675 The tip of the optical fiber was targeted slightly above the hippocampal CA3 (from  
676 bregma: -2.0 mm AP,  $\pm$  2.2 mm ML; from dura: + 1.2 mm DV). Mice attached with an  
677 optical fiber were then returned to their home cages and left individually at least for 1 h  
678 before beginning the cued-fear test session. Immediately before beginning the test  
679 session, mice were moved to the experimental room, and the fiber unit connected to the  
680 mouse was attached to an optical swivel (COME2-UFC, Lucir), which was connected to  
681 a laser (200 mW, 589 nm, COME-LY589/200; Lucir) via a main optical fiber. The  
682 delivery of light pulses was controlled by a custom-made schedule stimulator with  
683 OpenEx Software Suite (RX8-2, Tucker Davis Technologies, USA) in synchronized  
684 mode with a behavioral video tracking system (Muromachi Kikai). During both LFC  
685 and AFC test sessions, optical illumination (continuous 589 nm light, approximately 5  
686 mW output from the fiber tip) was delivered to the CA3 concurrently with the onset of  
687 the first CS in both LFC or AFC tasks, and maintained until the end of the test sessions.  
688 Mice were then returned to their home cages individually, and then the attached optic  
689 fiber was removed from the mice after the anesthesia. For post-hoc analysis, mice were

690 deeply anesthetized with a mixed anesthesia solution as described above, and perfused  
691 transcardially with 4% paraformaldehyde in PBS (pH 7.4), followed by  
692 immunohistochemical analysis to confirm virus vector infection.

693 For the wireless optogenetic experiment, to allow habituation to the 2 gram  
694 battery units (Bio Research Center), attachment and removal of the battery units was  
695 initiated from the habituation session by anesthetizing mice with 3% isoflurane before  
696 and after each behavioral session, respectively. The battery unit was attached to the  
697 implanted Teleopt LED device above the head, and mice were then returned to their  
698 home cages and left individually for at least 1 h until initiating behavioral sessions. For  
699 habituation to Cxt-A, mice attached to battery units were placed in Cxt-A for 10 min per  
700 day for 3 days. The time for pre-context habituation in the wireless optogenetic  
701 experiment was extended compared to the non-operated and wired optogenetic  
702 experiments to get mice attached with the battery well habituated to the chamber,  
703 because the battery's width was a little bit bigger than the widths of parts of optogenetic  
704 guide cannula and mice head. After 3 days of habituation sessions, mice were subjected  
705 to ten CS-US pairings of LFC in the training session. During the LFC training session,  
706 wireless optical illumination (590 nm continuous light, approximately 10 mW output  
707 from the fiber tip) was delivered to the CA3 region ten times for 10 s at 35 s intervals,  
708 during either the inter-trial interval phase following CS-US presentation (Tr-ON group)  
709 or during resting in the home cage 10 min after the training session (HC-ON group).  
710 Mice were then returned to their home cages individually, and the battery unit was  
711 removed under anesthesia. The delivery of light pulses was controlled by a custom-  
712 made schedule stimulator system as described above. One day after the training session,  
713 mice were attached to the battery unit and then subjected to a cued-fear memory test  
714 followed by a contextual fear memory test at 1 h intervals. For post-hoc analysis, mice  
715 were deeply anesthetized with the mixed anesthesia solution described above and  
716 perfused transcardially with 4% paraformaldehyde in PBS (pH 7.4), followed by  
717 immunohistochemical analysis to confirm virus vector infection.

718

### 719 ***In vivo* Ca<sup>2+</sup> imaging data acquisition in freely moving and head-fixed animals**

720 Attachment and removal of a microendoscope was performed under 3% isoflurane  
721 anesthesia before and after each behavioral experiment. Mice attached to the

722 microendoscope were returned to their home cages to recover for at least 30 min before  
723 and after the behavioral session. For the freely moving imaging experiment, mice were  
724 habituated to the endomicroscope attachment for 10 min per day for 3 days in their  
725 home cages before beginning the LFC behavioral study. During the 2 day habituation  
726 session, mice were also attached to the microendoscope. In both habituation sessions  
727 using the home cage and behavioral context, calcium imaging was performed, but  
728 acquired data were not analyzed. Subsequently, actual imaging began from the LFC  
729 training session to the test sessions. For freely moving CA1 Ca<sup>2+</sup> imaging, mice were  
730 subjected to training, 30 min resting after training, the 2 h short-term memory (STM)  
731 test, and then the 24 h long-term memory (LTM) test using the same LFC protocol.  
732 During the resting session, imaging was performed for 30 min. During the STM and  
733 LTM test sessions, after a 120 s acclimation session, mice were subjected to four CS  
734 presentations for 30 s at intervals of 30 s. However, STM session data were not  
735 analyzed because they were not important for the conclusion in this study. For freely  
736 moving CA3 Ca<sup>2+</sup> imaging, mice were subjected to training, allowed to rest, and the 24  
737 h LTM test was conducted using the same LFC protocol. During the resting session,  
738 imaging was performed for 30 min. During the LTM test sessions, after a 120 s  
739 acclimation session, mice were subjected to four CS presentations for 30 s at intervals  
740 of 30 s.

741 For the head-fixed imaging experiment, mice were habituated to  
742 endomicroscope attachment, and the fixation to the head-fixed apparatus comprised a  
743 footshock grid and an 8 W white light bulb, covered with a hemi-square paper box for  
744 10 min per day for 4 days before beginning the head-fixed experiment. During  
745 habituation sessions, calcium imaging was performed, but acquired data were not  
746 analyzed. The footshock grid and light bulb were identical to the devices used for the  
747 freely moving LFC paradigm, and were measured with behavioral software (Muromachi  
748 Kikai). On the next day, mice were subjected to a CS (15 s constant light) presentation  
749 session and then a US (3 s footshock, 0.4 mA) presentation at intervals of 1 h. For the  
750 CS presentation session, after 150 s acclimation, mice were subjected to ten CSs for 15  
751 s at 30 s intervals. For the US presentation session, after a 162 s acclimation time, mice  
752 were subjected to ten USs for 3 s at 42 s intervals. The durations of CS and US  
753 presentation sessions were 10 min total. In both freely moving and head-fixed imaging



754 experiments,  $\text{Ca}^{2+}$  imaging was performed under dim light (approximately 2 lx)  
755 conditions, and the onset of behavioral and imaging systems was synchronized using the  
756 OpenEx Software Suite (RX8-2, Tucker Davis Technologies).  $\text{Ca}^{2+}$  signals produced  
757 from G-CaMP7 protein expressed in CA3 and CA1 excitatory neurons were captured at  
758 20 Hz with nVista acquisition software (Inscopix) at the optimal gain and power of  
759 nVista LED.  $\text{Ca}^{2+}$  imaging movie recordings of all behavioral sessions were then  
760 extracted from the nVista Data acquisition (DAQ) box (Inscopix).

761 For post-hoc analysis, mice were deeply anesthetized with the mixed anesthesia  
762 solution described above and perfused transcardially with 4% paraformaldehyde in PBS  
763 (pH 7.4), followed by immunohistochemical analysis to confirm virus vector infection.

764

### 765 ***In vivo* $\text{Ca}^{2+}$ imaging data processing and analysis**

766 In both freely moving and head-fixed imaging experiments, only completely motion-  
767 corrected data was used for subsequent analysis. Data with an inadequate frame or that  
768 could not be corrected were excluded from analysis. Using Inscopix data processing  
769 software (IDPS, Inscopix) to create a full movie, recorded raw movies were temporally  
770 concatenated, spatially down-sampled ( $2\times$ ) and cropped, and then corrected for motion  
771 artifacts against a reference frame. A reference frame showing clear blood vessels as  
772 landmarks was chosen, and other frames were then aligned to the reference frame.  
773 Further motion correction was performed using Inscopix Mosaic software (Mosaic,  
774 Inscopix) as described previously<sup>41,44</sup>. The corrected full movie was then temporally  
775 divided into individual behavioral sessions using Inscopix Mosaic software.  
776 Subsequently, each individual session movie was low bandpass-filtered to reduce noise  
777 using Fiji software (NIH, USA) as described previously (see Extended Data Fig. 2). The  
778 change of fluorescence signal intensity ( $\Delta F/F$ ) for each behavioral session was  
779 subsequently calculated using Inscopix Mosaic software according to the formula  $\Delta F/F$   
780  $= (F - F_m)/F_m$ , where  $F$  represents the fluorescence of each frame and  $F_m$  is the mean  
781 fluorescence for the entire session movie. Subsequently, movies representing each  
782 session were re-concatenated to generate full movies including all sessions in the  $\Delta F/F$   
783 format. Finally, cells were identified using an automatic sorting system, and HOTARU  
784 and  $\text{Ca}^{2+}$  signals of the detected cells over time were extracted in a ( $\check{D}$ ; time  $\times$  neuron)  
785 matrix format, as described previously.



786 Subsequent data processing and analysis were performed using a custom-made  
787 MATLAB code.  $\text{Ca}^{2+}$  signals were subjected to high-pass filtering ( $> 0.01$  Hz threshold)  
788 to remove low frequency fluctuations and background noise in each  $\text{Ca}^{2+}$  cell signal, in  
789 which negative values were replaced with “0”. Using the filtered  $\text{Ca}^{2+}$  signal, the z-  
790 scores of behavioral sessions (training, resting, and LTM test sessions) were separately  
791 calculated to normalize and detect  $\text{Ca}^{2+}$  activities by thresholding ( $> 3$  Standard  
792 Deviations from the  $\Delta F/F$  signal) at the local maxima of the  $\Delta F/F$  signal<sup>44</sup>. Then, to  
793 calculate the responsiveness of the cells to each behavioral event, z-scored  $\text{Ca}^{2+}$  activity  
794 was temporally sorted into nine behavioral events consisting of training acclimation  
795 (baseline), training CS (CS), training US (US), inter-trial interval 1 (ITI-1;  $\sim 0$ –15 s after  
796 US-CS), ITI-2 ( $\sim 16$ –30 s after CS-US) sessions in the training session, resting (Rest)  
797 session, test acclimation (Test-Acc), CS (Test-CS), and ITI (Test-ITI) in LTM test  
798 sessions. The mean  $\text{Ca}^{2+}$  activities corresponding to behavioral events were calculated,  
799 and then divided by each cell baseline event to index responsiveness across behavioral  
800 events. Afterwards, CS-, US-, and Test-CS-responsive subpopulations with  $2\times$  greater  
801 responsiveness to stimuli than that of the baseline event were sorted.  $\text{Ca}^{2+}$  activities of  
802 these subpopulations were tracked across the LFC paradigm to calculate the mean  $\text{Ca}^{2+}$   
803 activities of nine behavioral sessions and 1 s average  $\text{Ca}^{2+}$  activities for subsequent  
804 analyses, by which  $\text{Ca}^{2+}$  activities between genotypes were compared.

805 For functional connectivity analysis, to detect the  $\text{Ca}^{2+}$  event, the z-scores in  
806 CS-, US-, and Test-CS-responsive subpopulations as described above were binarized by  
807 thresholding ( $> 3$  Standard Deviations from the  $\Delta F/F$  signal) at the local maxima of the  
808  $\Delta F/F$  signal, and then were temporally down-sampled from 20 to 2 Hz data (500 ms  
809 binning). Subsequently, the functional connectivity, consisting of the number of  
810 synchronized activities among neurons of the two subpopulations in each 500 ms time  
811 window, was calculated and normalized as the functional connectivity in each  
812 behavioral session. The equation used for this analysis is below:

813

814 Pairwise connectivity index =  $\frac{1}{T} \frac{\sum_{t=1}^T n_{\text{Session A}}(t) \cdot n_{\text{Session B}}(t)}{N_{\text{Session A}} \cdot N_{\text{Session B}}}$

815

816 Triple-wise connectivity index =  $\frac{1}{T} \frac{\sum_{t=1}^T n_{\text{Session A}}(t) \cdot n_{\text{Session B}}(t) \cdot n_{\text{Session C}}(t)}{N_{\text{Session A}} \cdot N_{\text{Session B}} \cdot N_{\text{Session C}}}$

817

818 Where  $n_{Session A}(t)$  ( $n_{Session B}(t)$ ,  $n_{Session C}(t)$ ) is the number of Session A (Session B,  
819 Session C) cells that were active in the time bin  $t$ ;  $N_{Session A}$  ( $N_{Session B}$ ,  $N_{Session C}$ ) is  
820 the total number of Session A (Session B, Session C) cells; and  $T$  is the total number of  
821 time bins for each session.

822 When the correlation between cued freezing and functional connectivity during  
823 ITI-1 was calculated, the variable, the change in ITI-1 connectivity relative to the  
824 baseline session in each cell, was calculated and used for correlation analyses.

825

### 826 **Population vector analyses**

827 Calculations for the Mahalanobis population vector distance (PVD) and population  
828 vector rotation were conducted as described previously with some modifications. For  
829 Mahalanobis population vector distance, the 1 s-averaged z-scores in CS- and US-  
830 responsive subpopulations described above were used after principal component  
831 analysis (PCA)-based dimension reduction<sup>26</sup>. Since Mahalanobis distance does not work  
832 well because of the curse of dimensionality when the number of cells/dimensions ( $p$ ) is  
833 greater than the number of available samples ( $n$ ), ( $p > n$ ), PCA was used to reduce the  
834 number of cells/dimensions in the data sets The data sets of 1 s-averaged z-scores in  
835 subpopulations are reduced into a lower dimension, and subsequently, the top three  
836 PCA scores (PC1, PC2, and PC3) are used to calculate the Mahalanobis population  
837 vector distance via PCA to quantify the similarity of two sets of neuronal  
838 representations between the CS or US session and ITI-1 sessions in CS and US  
839 ensembles, respectively. We defined a group of 3-dimensional activity vectors,  $x$ , for  
840 each behavioral session (CS, US, or ITI-1) and calculated the PVD between the two  
841 representations. For example, the Mahalanobis PVD ( $M$ ) between sets of CS- and ITI-1-  
842 evoked ensemble activity patterns in the CS ensemble is as follows:

843

$$M^2 = (x - \mu)^T \Sigma^{-1} (x - \mu)$$

844

845 where  $x$  and  $\mu$  are the individual and mean population vectors for the ITI-1 and CS  
846 ensemble activities, respectively, and  $x^T$  and  $\mu^T$  are their transposes. The Mahalanobis

847 distance accounts for differences in the means of the two sets of ensemble activities as  
848 well as their co-variances. The average PVD over all points  $x$  in both sets of ensemble  
849 activities was calculated. To analyse the CS-ITI-1 and US-ITI-1 PVDs during the ten  
850 CS-US presentations in the CS and US ensembles, respectively, the top three PC scores  
851 calculated from the 1 s-averaged z-score data set are used, and the scores sorted by the  
852 CS, US, and ITI-1 sessions across ten trials are used for the mean population vector  
853 construction; subsequently, the relative change in PVD to ITI in each ensemble is  
854 calculated.

855         When the rotation of population vector between CS or US and ITI-1 sessions in  
856 CS- and US-responsive ensembles was calculated, we used the 1 s-averaged z-scores in  
857 CS- and US-responsive subpopulations.

858

### 859 **Immunohistochemistry and microscopy**

860 Immunohistochemistry was conducted as described previously<sup>29</sup>. Mice were deeply  
861 anesthetized with the mixed anesthesia solution described above and perfused  
862 transcardially with 4% paraformaldehyde in PBS (pH 7.4). Brains were removed and  
863 further post-fixed by immersion in 4% PFA in PBS for 24 h at 4°C. Each brain was  
864 equilibrated in 25% sucrose in PBS for 2 days and then frozen in dry ice powder. Fifty  
865  $\mu\text{m}$  coronal sections were cut on a cryostat and stored at -20°C in cryoprotectant  
866 solution (25% glycerol, 30% ethylene glycol, 45% PBS) until further use. For  
867 immunostaining, sections were transferred to 12-well cell culture plates (Corning, USA)  
868 containing Tris-buffered saline TBS-T buffer (with 0.2% Triton X-100, 0.05% Tween-  
869 20).

870 For EYFP or G-CaMP and/or RGS-14 detection, after washing with TBS-T buffer, the  
871 floating sections were treated with blocking buffer (5% normal donkey serum [S30,  
872 Chemicon, USA] in TBS-T) at room temperature for 1 h. Primary antibody incubations  
873 were performed in blocking buffer containing rabbit anti-GFP (1:500, A11122;  
874 Molecular Probes, USA) and/or mouse anti-RGS-14 (1:500, N133/21; NeuroMab,  
875 USA) antibodies at 4°C for 1–2 days. After three 20 min washes with TBS-T, the  
876 sections were incubated with donkey anti-rabbit IgG-AlexaFluor 488 (1:500, A21206;  
877 Molecular Probes) and/or donkey anti-mouse IgG-AlexaFluor 546 secondary antibodies  
878 (1:500, A11036; Molecular Probes) in the blocking buffer at room temperature (RT) for

879 3 h.

880 For tdTomato detection, after washing with TBS-T buffer, floating sections were  
881 treated with blocking buffer (5% normal goat serum [S1000, Vector Laboratories, USA]  
882 in TBS-T) at RT for 1 h. Incubation with primary antibodies was performed in blocking  
883 buffer containing rabbit anti-DsRed (1:1000, 632496; Clontech-Takara Bio, Japan)  
884 antibody at 4°C for 1–2 days. After three 20 min washes in TBS-T, sections were  
885 incubated with goat anti-rabbit IgG-AlexaFluor 546 secondary antibodies (1:300,  
886 A11035; Molecular Probes) in blocking buffer at RT for 3 h. Sections were treated with  
887 DAPI (1 µg/mL, 10236276001; Roche Diagnostics, Switzerland) and then washed with  
888 TBS three times (20 min/wash). The sections were mounted on slide glass with  
889 ProLong Gold antifade reagent (Invitrogen, USA). Images were acquired using a  
890 Keyence microscope (BIO-REVO, KEYENCE, Japan) with a Plan-Apochromat 4× or  
891 20× objective lens.

892

### 893 **Statistics**

894 Data are presented as means ± s.e.m. unless specified otherwise. Box plots represent  
895 median, first, and third quantiles, and their whiskers show minimum and maximum  
896 values. In box plots, outlier values are not shown for clarity of presentation, but all data  
897 points and animals were included in statistical analyses. Statistical analyses were  
898 performed using Excel (Microsoft) with Statcel4 (OMS, Japan) and MATLAB  
899 (Mathworks, USA) as described previously<sup>29</sup>. Comparisons of data between two groups  
900 were analyzed with a two-sided Student's *t* test, Wilcoxon rank sum test, or Wilcoxon  
901 signed-rank test, based on the distribution and “n” size of the data. Correlation was  
902 analyzed with a Pearson correlation coefficient test. Multiple-group comparisons were  
903 conducted using two-way analysis of variance (ANOVA) with a post-hoc Tukey–  
904 Kramer multiple comparisons test when significant main effects were detected.  
905 Quantitative data are expressed as means ± SEM.

906

### 907 **Data and code availability**

908 The data and codes that supported the findings of this study are available from the  
909 corresponding author upon reasonable request.

910

911

912 **Acknowledgments**

913 We are grateful to K. Deisseroth (Stanford University) for providing eArch3.0-EYFP  
914 cDNA; S. Tonegawa (MIT) and S. Itohara (RIKEN) for providing floxed-NR1  
915 transgenic mice; T. Fukai (Okinawa Institute of Science and Technology) and T. Haga  
916 (RIKEN) for mathematical analysis; T. Takekawa (Kogakuin University) for early  
917 access to the HOTARU detection system; M. Ito and N. Takino (Jichi Medical  
918 University) for production of the AAV vector. We thank alumni and current members  
919 of the Inokuchi laboratory for discussion. This work was supported by JSPS KAKENHI  
920 (grant number: JP18H05213), the Core Research for Evolutional Science and  
921 Technology (CREST) program (JPMJCR13W1) of the Japan Science and Technology  
922 Agency (JST), a Grant-in-Aid for Scientific Research on Innovative Areas “Memory  
923 dynamism” (JP25115002) from MEXT support to K.I., and the Grant-in-Aid for JSPS  
924 KAKENHI Scientific Research(B) (20H03554), Challenging Research (Exploratory)  
925 (17K19445), THE HOKURIKU BANK Grant-in-Aid for Young Scientists, the  
926 FIRSTBANK OF TOYAMA SCHOLARSHIP FOUNDATION RESERCH GRANT,  
927 the Takeda Science Foundation, the Tamura Science and Technology Foundation, and  
928 the Narishige Neuroscience Research Foundation support to M.N.

929

930 **Author contributions**

931 M.N. and K.I. designed the experiments and wrote the manuscript. M.N. and E.M.  
932 performed the surgeries. M.N. performed behavioral experiments. M.N., E.M., and  
933 R.O.S. analyzed behavioral data. M.N. and S.O. performed calcium data analysis. M.N.  
934 wrote MATLAB codes. S.M. prepared the AAV. K.I. supervised the entire project.

935

936 **Competing interests declaration**

937 The authors have no conflicts of interest to declare.

938

939 **Correspondence and requests for materials** should be addressed to K.I.

940

941

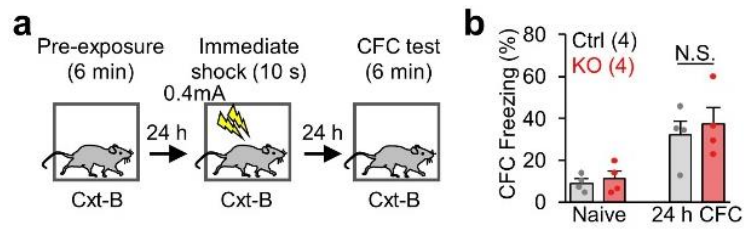

942

943 **Extended Data Figure 1 | CA3-NR KO mice exhibited comparable contextual**

944 **freezing in the pre-exposure-facilitated CFC task. a, Experimental design. b,**

945 Contextual freezing levels in 24 h long-term memory test. *P* values were calculated

946 using an unpaired two-tailed *t* test. N.S., not significant ( $P > 0.05$ ). Graphs represent

947 means  $\pm$  SEM, and circles in the graph represent individual animals. Numbers in

948 parentheses denote the number of mice in each group used for the study. Lightning bolt,

949 footshock; Cxt, context; HPC, hippocampus; AP, anterior-posterior; N.S., not

950 significant.

951

952

953



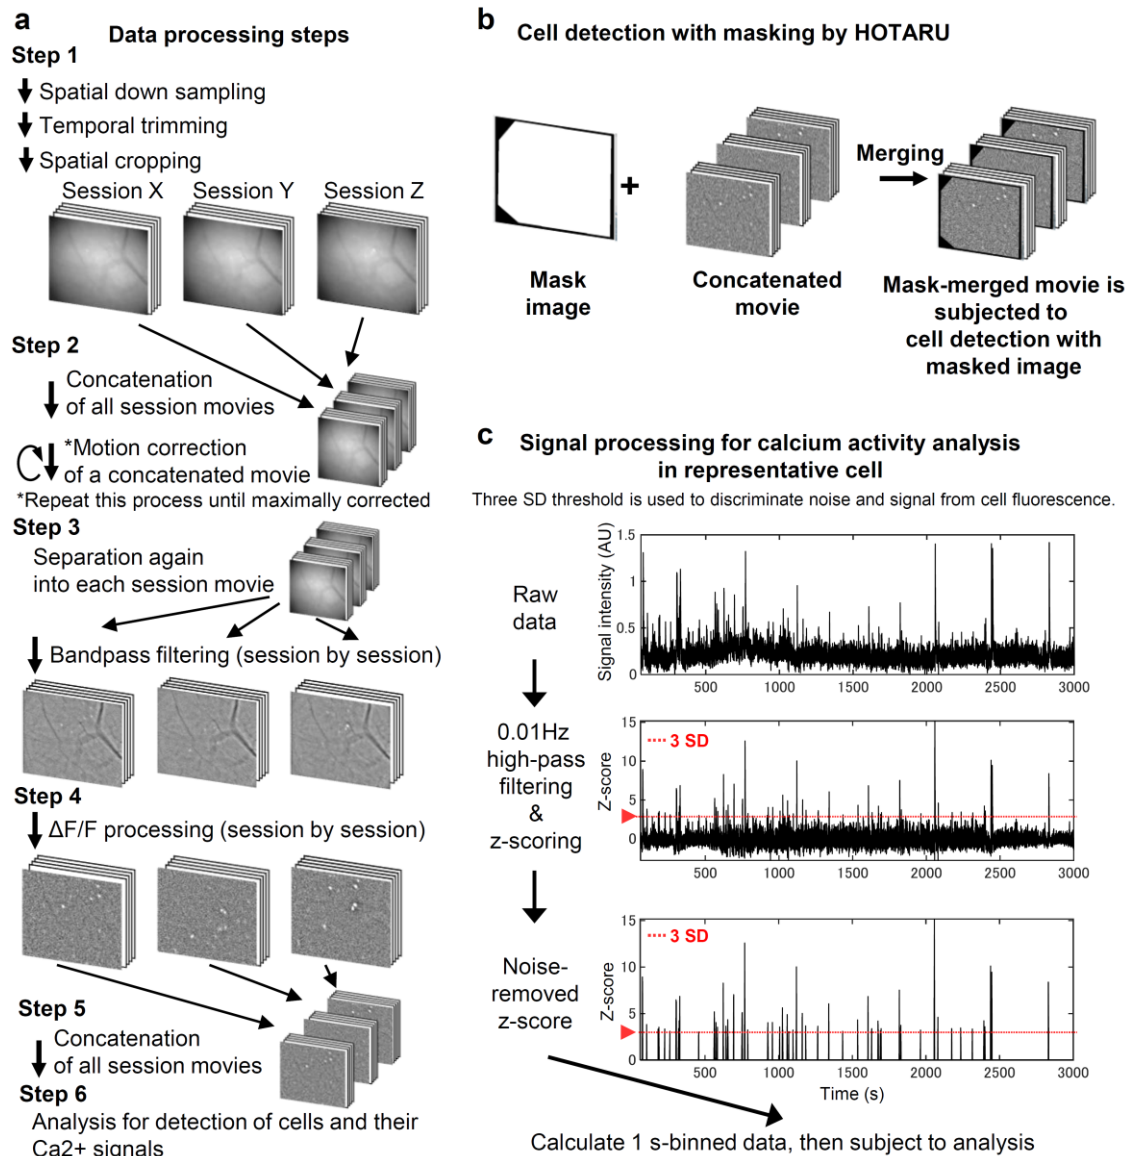

954

955

956

957

958

959

960

961

962

963

964

**Extended Data Figure 2 | Data processing and cell detection for analysis.** **a**, Data processing steps. Step 1: movies acquired from each behavioral session are down-sampled, temporally trimmed, and spatially cropped. Step 2: the movies are concatenated into a series of movies, and repeatedly corrected until artifacts of movement are minimized. Step 3: the concatenated movie is separated again into pre-concatenated movies and subsequently subjected to bandpass filtering. Step 4:  $dF/F$  conversion. Step 5: re-concatenation. Step 6: the concatenated- and registered-movie is subjected to cell detection. **b**, A train of  $dF/F$  is subjected into the HOTARU algorithm to automatically detect active cells. **c**, The acquired calcium trace signal is converted into calcium activity by high-pass filtering, z-score normalization, and cutoff of

965 inadequate signal in each cell to remove background fluctuation. Then 1 s-mean  
966 calcium activities are subjected to quantitative analyses. The dashed line indicates a  
967 cutoff threshold less than three standard deviations ( $< 3 SD$ ).

968

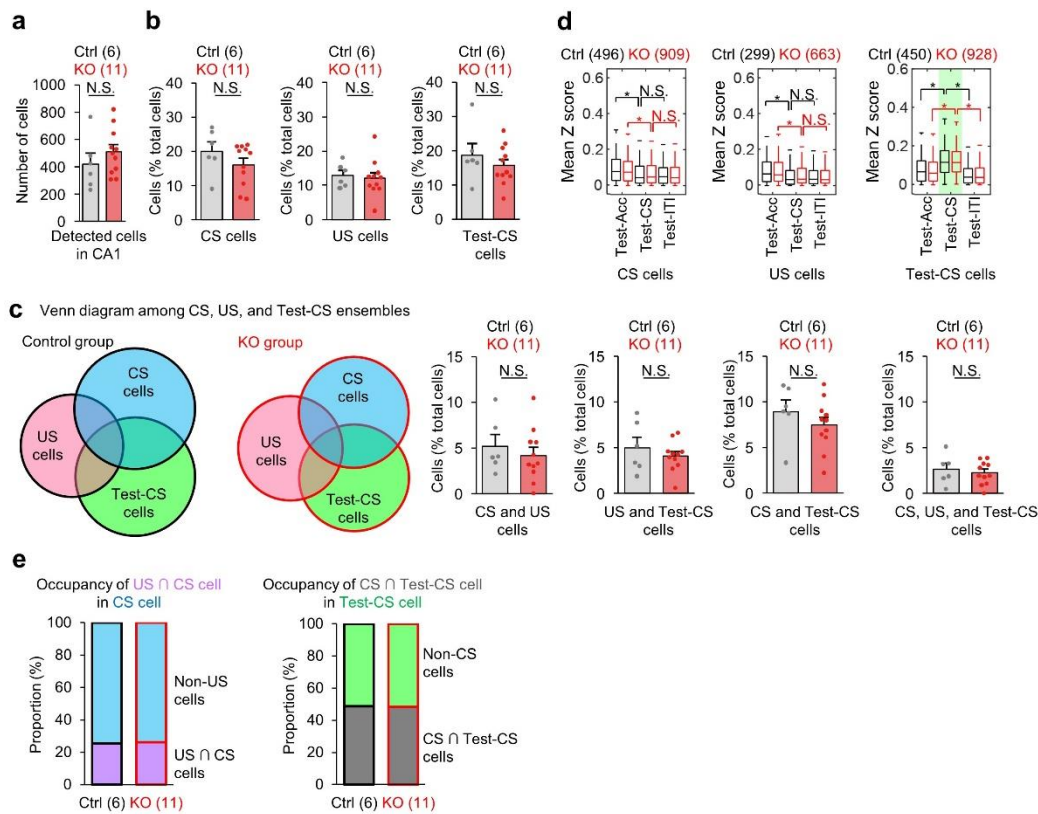

969

970

**Extended Data Figure 3 | CA3-NR1 KO mice exhibited normal CA1 ensemble**

971

**structure. a**, Columns comparing number of detected cells during CA1 imaging in

972

control and CA3-NR1 KO mice. **b**, Columns comparing percentile of ensemble size in

973

CS-, US-, and Test-CS-responsive subpopulations between control and KO mice. **c**,

974

Venn diagrams comparing and illustrating the overlapping and size of each ensemble in

975

CA1. Columns comparing the percentiles of overlapping ensemble sizes among CS-,

976

US-, and Test-CS-responsive subpopulations between control and KO mice. **d**, Box

977

plots comparing mean z-scores of long-term memory test sessions between genotypes in

978

CS-, US-, and Test-CS-responsive subpopulations. **e**, Left, occupancy of US  $\cap$  CS-

979

responsive cells in the CS-responsive cell population. Right, occupancy of CS-

980

responsive cells in the Test-CS-responsive population. Numbers in parentheses denote

981

the number of mice (**a-c**) or cells (**d**) in each group used for the study. *P* values were

982

calculated using an unpaired two-tailed *t* test (**a-c**, **e**) or Wilcoxon signed-rank test (**d**)

983

(\**P* < 0.001). N.S., not significant (*P* > 0.05). Box plots illustrate median, first, and

984

third quantiles, and minimum and maximum values. Graphs represent means  $\pm$  SEM,

985

and circles in the graphs represent individual animals.

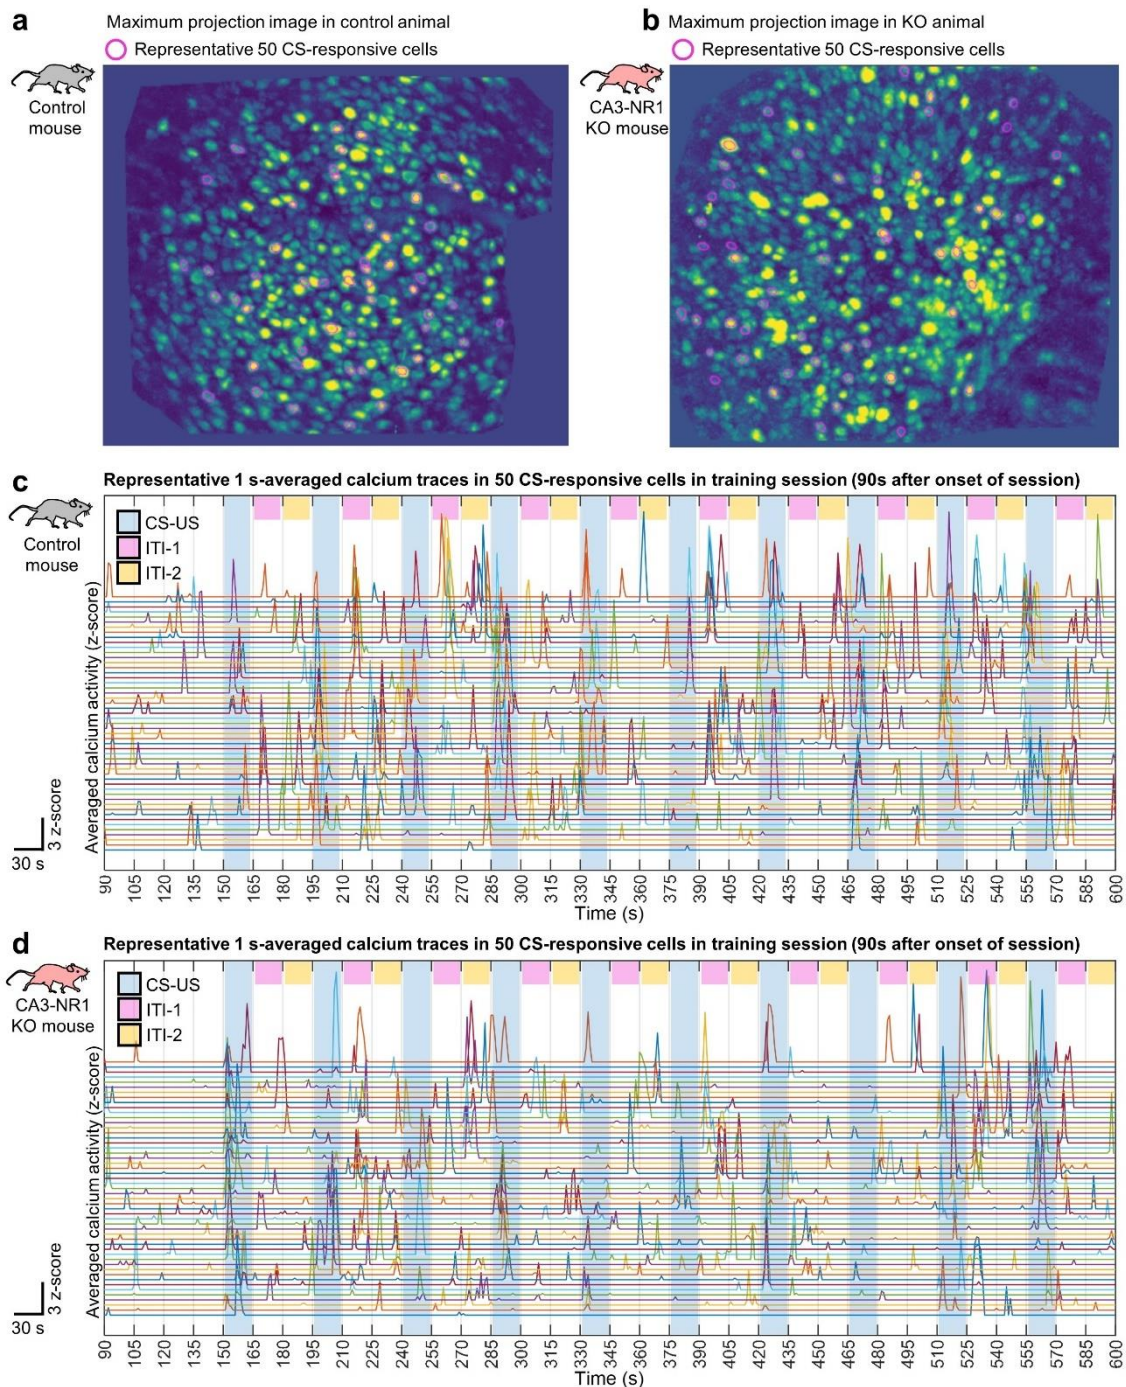

986

987 **Extended Data Figure 4 | Representative *in vivo* calcium imaging data acquisition**  
988 **in CA1 of freely moving animals. a, b, Stacked- and pseudo-colored dF/F images**  
989 **acquired using the microendoscope over entire recording sessions of imaging in the**  
990 **hippocampus from control (a) and KO (b) animals. Magenta circles indicate the**  
991 **footprint contours of detected cells. c, d, Representative 1 s-averaged calcium activities**  
992 **in representative 50 CS-responsive cells during LFC training 90 s after onset of**

993 behavioral session to end in control (**c**) and KO (**d**) animals. Blue, pink, and yellow  
994 rectangles indicate the timings of CS-US, ITI-1, and ITI-2, respectively.  
995



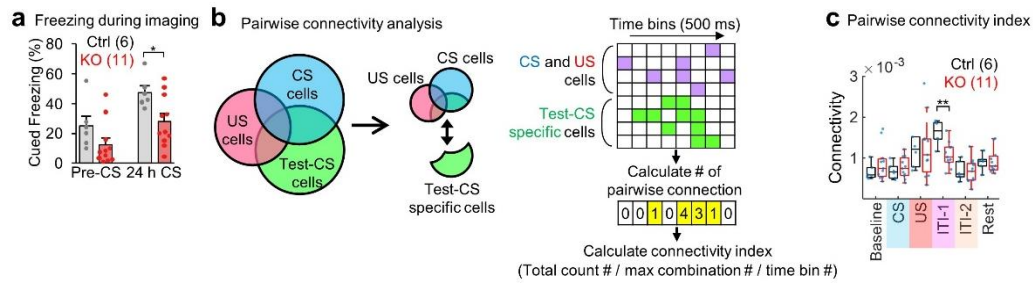

996

997

**Extended Data Figure 5 | CA3-NR KO mice exhibited impaired functional**

998

**connectivity between CS ∪ US- and Test-CS-responsive specific cells. a,** Cued

999

freezing levels during 24 h long-term memory tests in the imaging study. **b,** Scheme for

1000

connectivity analysis. Binarized Ca<sup>2+</sup> activity in each cell is sorted into CS ∪ US- and

1001

Test-CS-responsive specific subpopulations, and then pairwise connectivity is

1002

calculated by normalizing the number of synchronized connections every 500 ms in

1003

each session. **c,** Box plots comparing the mean connectivity between genotypes in each

1004

session. Numbers in parentheses denote the number of mice (**a, c**) in each group used

1005

for the study. *P* values were calculated using an unpaired two-tailed *t* test (**a, c**) (\**P* <

1006

0.05, \*\**P* < 0.01). Box plots illustrate median, first, and third quantiles, and minimum

1007

and maximum values. Graphs and scatter plots represent means ± SEM. In graphs,

1008

circles represent individual animals.

1009



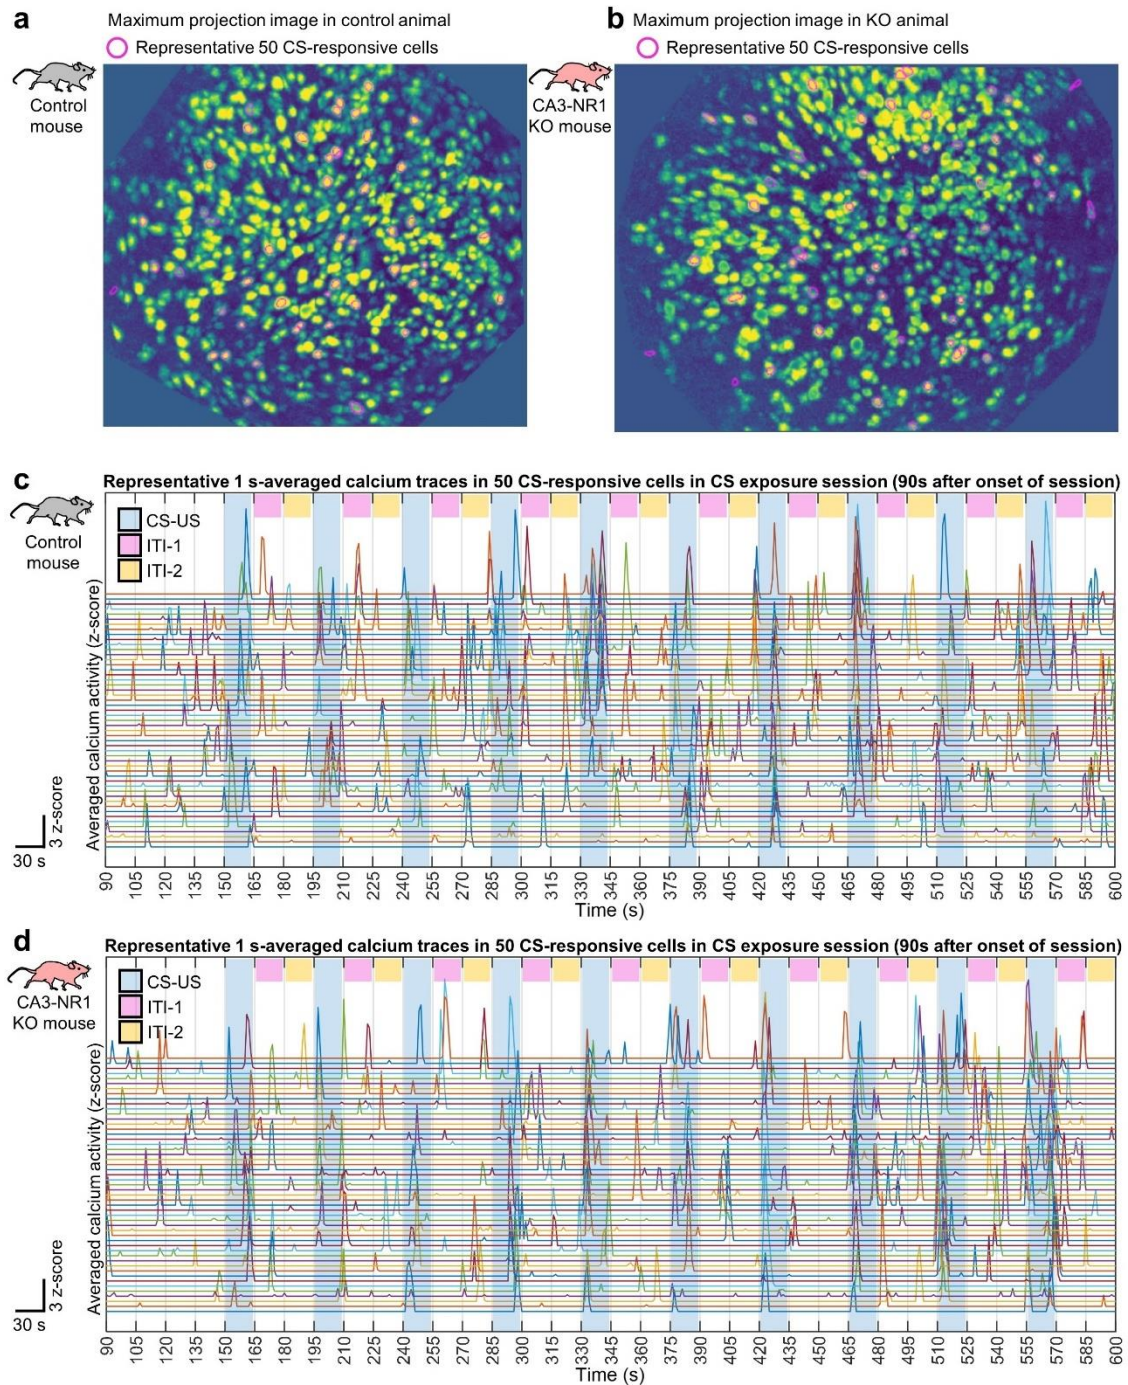

1010

1011 **Extended Data Figure 6 | Representative *in vivo* calcium imaging data acquisition**

1012 **in CA1 of head-fixed animals. a, b, Stacked- and pseudo-colored dF/F images**

1013 **acquired through the microendoscope over entire recording sessions of imaging in the**

1014 **hippocampus (right) from (a) control and (b) KO animals. Magenta circles indicate the**

1015 **footprint contours of detected cells. c, d, Representative 1 s-averaged calcium activities**

1016 **in 50 representative CS-responsive cells during LFC training (90 s after beginning the**

1017 behavioral session to the end) in (c) control and (d) KO animals. Blue, pink, and yellow  
1018 rectangles indicate the timings of CS-US, ITI-1, and ITI-2, respectively.  
1019

1020

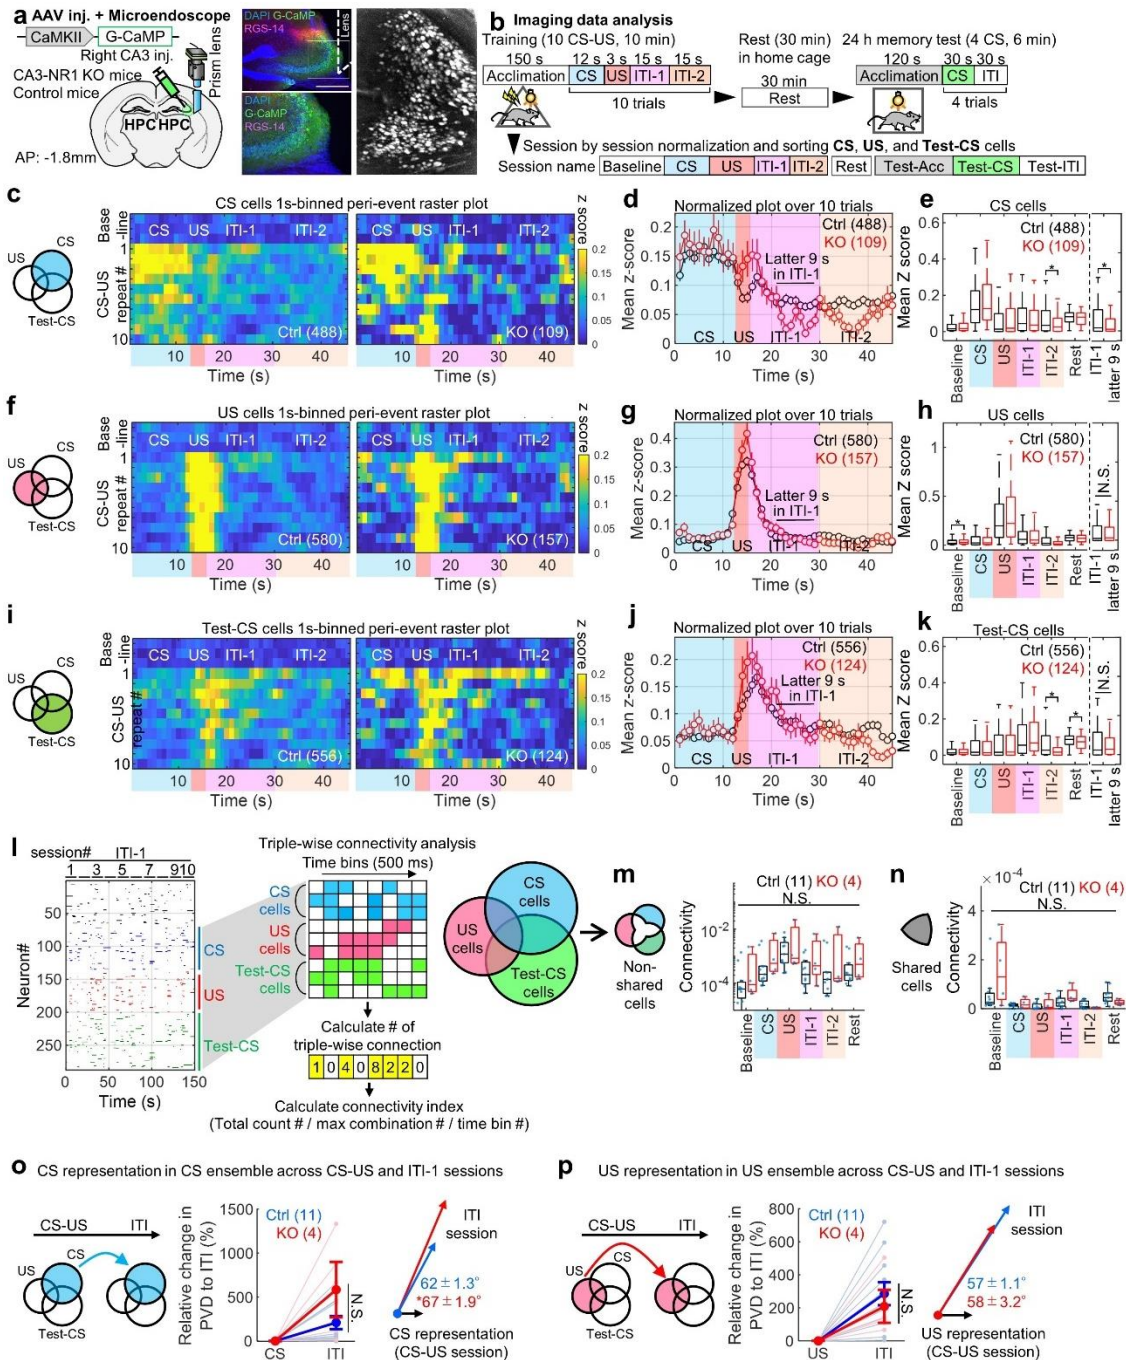

1021

1022

1023

1024

1025

1026

1027

**Extended Data Figure 7 | CA3-NR1 KO mice exhibited impaired reverberatory activity following CS-US presentation in CS- and Test-CS-responsive CA3 subpopulations under free-moving conditions.** **a**, Left, experimental design. Right, coronal section of the hippocampus with G-CaMP-expressed cells (green) in CA3 and immunostained with anti-RGS-14 (red). RGS-14 is a marker for CA2 and stacked dF/F images acquired through the microendoscope over entire recording sessions of imaging



1028 in the hippocampus. Scale bar, 500  $\mu$  m. **b**, Scheme of imaging data analysis. In each  
1029 cell,  $\text{Ca}^{2+}$  data is classified into nine sessions, and the calculated mean z-score is  
1030 considered to represent responsiveness and sorted into CS-, US-, and Test-CS-  
1031 responsive subpopulations. **c**, Venn diagrams illustrating CS ensembles. Peri-event  
1032 raster plots during training sessions in CS-responsive subpopulations of (left) control  
1033 and (right) KO mice. Each short vertical tick represents a 1 s change of mean z-score  
1034 across baseline and ten CS-US pairings.  $\text{Ca}^{2+}$  activities are aligned at the time when CS-  
1035 US stimuli were delivered. The color code indicates mean z-scores. **d**, Averaged z-score  
1036 plots over ten CS-US pairings in CS-responsive subpopulations. **e**, Box plots comparing  
1037 mean z-scores between genotypes in each session. **f**, Venn diagrams illustrating  
1038 ensembles. Peri-event raster plots during training sessions in US-responsive  
1039 subpopulations of (left) control and (right) KO mice. Each short vertical tick represents  
1040 a 1 s change of mean z-score across baseline and ten CS-US pairings.  $\text{Ca}^{2+}$  activities are  
1041 aligned at the time when CS-US stimuli were delivered. The color code indicates mean  
1042 z-scores. **g**, Averaged z-score plots over ten CS-US pairings in US-responsive  
1043 subpopulations. **h**, Box plots comparing mean z-scores between genotypes in each  
1044 session. **i**, Venn diagrams illustrating Test-CS ensembles. Peri-event raster plots during  
1045 training sessions in Test-CS-responsive subpopulations of (left) control and (right) KO  
1046 mice. Each short vertical tick represents a 1 s change of mean z-score across baseline  
1047 and ten CS-US pairings.  $\text{Ca}^{2+}$  activities are aligned at the time when CS-US stimuli  
1048 were delivered. The color code indicates mean z-scores. **j**, Averaged z-score plots over  
1049 ten CS-US pairings in Test-CS-responsive subpopulations. **k**, Box plots comparing  
1050 mean z-scores between genotypes in each session. **l**, Left, representative binarized raster  
1051 plots of  $\text{Ca}^{2+}$  activity across ten ITI-1 sessions in control animals. Right, magnified  
1052 raster plots focusing on CS-, US-, and Test-CS-responsive subpopulations and scheme  
1053 for connectivity analysis. This analysis calculates connectivity by normalizing the  
1054 number of synchronized connections in every 500 ms among three subpopulations in  
1055 each session. **m**, **n**, Box plots comparing mean connectivity between genotypes in each  
1056 session. **o**, **p**, Mahalanobis PVD and rotation between CS and ITI-1 sessions in the CS-  
1057 responsive ensemble (**o**), and between US and ITI-1 sessions in the US-responsive  
1058 ensemble (**p**). Numbers in parentheses denote the (**d**, **e**, **g**, **h**, **j**, **k**) number of cells or (**m**,

1059 **n, o, p**) mice in each group used for the study. *P* values were determined using a  
1060 Wilcoxon rank sum test (**e, h, k**) or an unpaired two-tailed *t* test (**m, n, o, p**) (\**P* < 0.05).  
1061 N.S., not significant (*P* > 0.05). Box plots indicate median, first, and third quantiles, and  
1062 minimum and maximum values. Graphs indicate means ± SEM. In graphs, circles  
1063 represent individual animals.  
1064

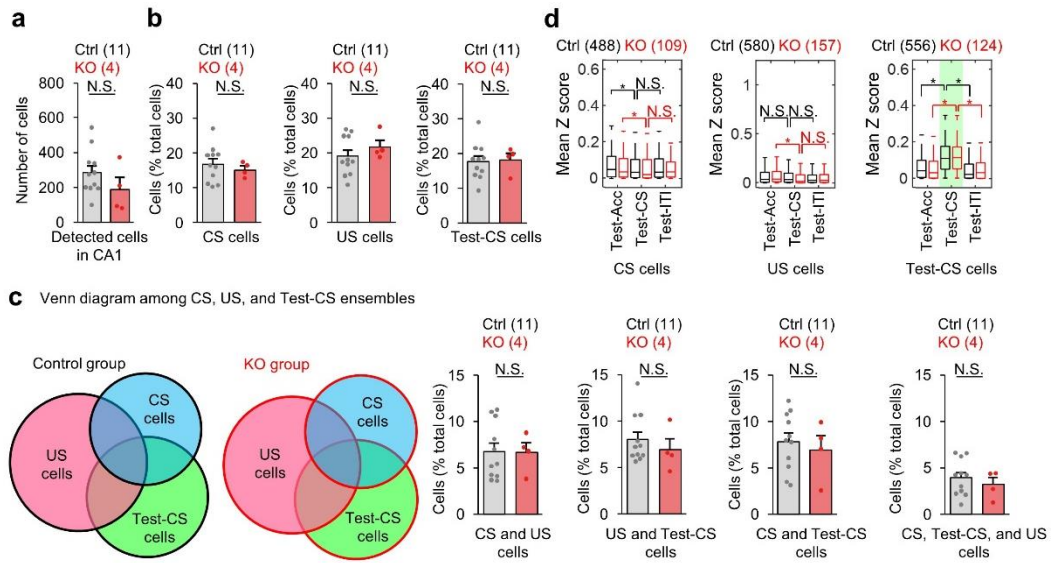

1065

1066

1067

1068

1069

1070

1071

1072

1073

1074

1075

1076

1077

1078

1079

1080

1081

1082

**Extended Data Figure 8 | CA3-NR KO mice exhibited normal CA3 ensemble**

**structure.** **a**, Columns comparing the number of detected cells during CA3 imaging in control and CA3-NR1 KO mice. **B**, Columns comparing percentiles of ensemble sizes in CS-, US-, and Test-CS-responsive subpopulations between control and KO mice. **c**, Venn diagrams comparing and illustrating the overlapping and size of each ensemble in CA3. Columns compare the percentiles of overlapping ensemble sizes between CS-, US-, and Test-CS-responsive subpopulations between control and KO mice. **D**, Box plots comparing mean z-scores of long-term memory test sessions between genotypes in CS-, US-, and Test-CS-responsive subpopulations. Numbers in parentheses denote the number of (**a-c**) mice or (**d**) cells in each group used for the study. *P* values were determined using (**a-c**) an unpaired two-tailed *t* test or (**d**) a Wilcoxon signed-rank test (\**P* < 0.001). N.S., not significant (*P* > 0.05). Box plots represent median, first, and third quantiles, and minimum and maximum values. Graphs show means ± SEM. In graphs, circles represent individual animals.



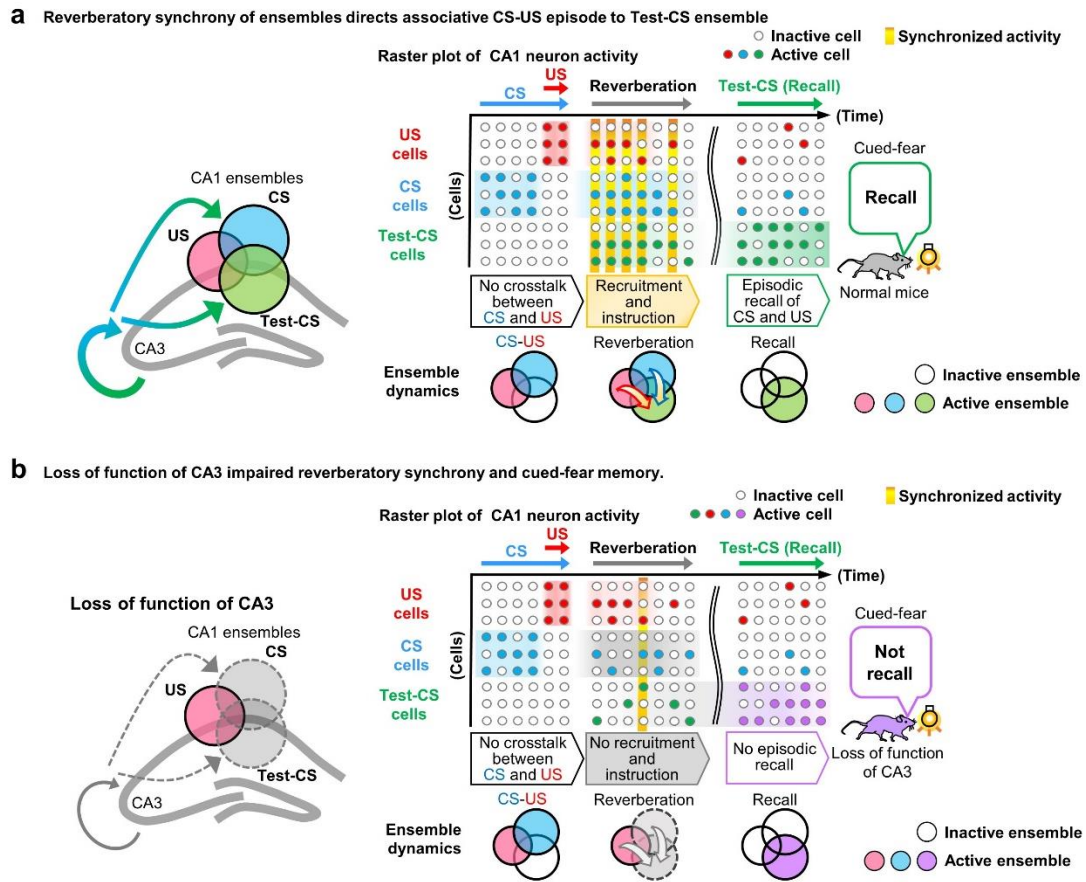

1099 during recall, Test-CS-responsive cells fail to drive cued-fear memory recall. Filled  
1100 circles with color indicate activated cells in each behavioral session. Arrows indicate the  
1101 direction of information flow. Light bulb, light CS; yellow bar, moment-occurring  
1102 synchrony among CS-, US-, and Test-CS cell ensembles.  
1103

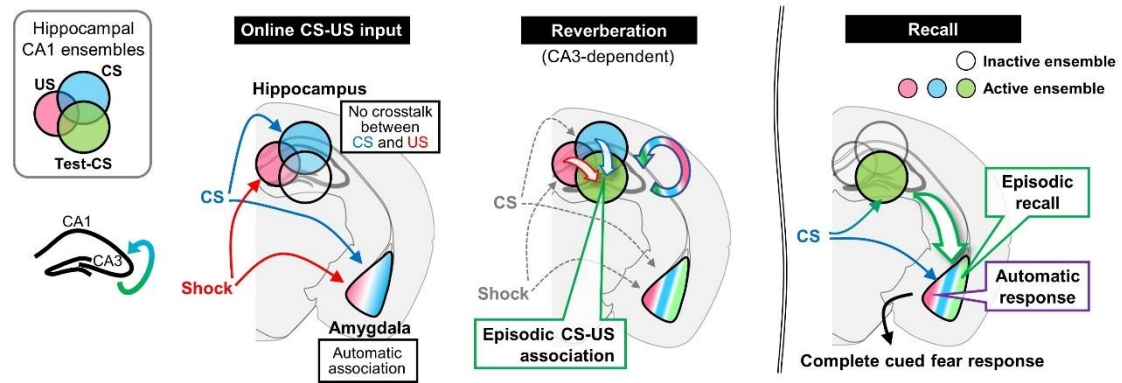

1104

1105 **Extended Data Figure 10 | Model for hippocampal function in cued-fear memory.**

1106 Venn diagrams showing CS-, US-, and Test-CS-responsive cell ensembles in CA1.

1107 During online CS and US inputs in training, the hippocampus encodes CS and US

1108 information independently, while the amygdala associates CS and US directly as

1109 automatic association. During reverberation, the hippocampus produces episodic CS-US

1110 association. During recall, the Test-CS-responsive cell ensemble in the hippocampus

1111 sends the episodic portion of the CS-US information to the amygdala to complete cued-

1112 fear memory. Filled circles and amygdala icons with color indicate temporal activation

1113 throughout learning and recall.

1114

1115

1116

1117 **Additional References**

1118

1119 40 Basu, J. *et al.* Gating of hippocampal activity, plasticity, and memory by  
1120 entorhinal cortex long-range inhibition. *Science* **351**, aaa5694,  
1121 doi:10.1126/science.aaa5694 (2016).

1122 41 Asai, H. *et al.* Pcdhbeta deficiency affects hippocampal CA1 ensemble activity  
1123 and contextual fear discrimination. *Mol Brain* **13**, 7, doi:10.1186/s13041-020-  
1124 0547-z (2020).

1125 42 Miyamoto, D. *et al.* Top-down cortical input during NREM sleep consolidates  
1126 perceptual memory. *Science* **352**, 1315-1318, doi:10.1126/science.aaf0902 (2016).

1127 43 Yokose, J. *et al.* Overlapping memory trace indispensable for linking, but not  
1128 recalling, individual memories. *Science* **355**, 398-403 (2017).

1129 44 Kitamura, T. *et al.* Engrams and circuits crucial for systems consolidation of  
1130 a memory. *Science* **356**, 73-78, doi:10.1126/science.aam6808 (2017).

1131

1132
